# Supplementary material for: Simultaneous Determination of Methylated Nucleosides by HILIC–MS/MS Revealed Their Alterations in Urine from Breast Cancer Patients
Source: MDPI journal article supplement (doi:10.3390/metabo12100973), 2022-10-14
Supplement: s1 [file s1]

**Supporting Information**  
**for**  
**Simultaneous determination of methylated nucleosides by HILIC-MS/MS**  
**revealed their alterations in urine from breast cancer patients**

Zhihao Fang<sup>1</sup>, Yiqiu Hu<sup>1</sup>, Xiujuan Hong<sup>1</sup>, Xiaoxiao Zhang<sup>1</sup>, Tao Pan<sup>2</sup>, Chi Pan<sup>2</sup>, Shu Zheng<sup>1,3\*</sup>,  
Cheng Guo<sup>1,3\*</sup>

<sup>1</sup>Cancer Institute (Key Laboratory of Cancer Prevention and Intervention, China National Ministry of Education), The Second Affiliated Hospital, Zhejiang University School of Medicine, Hangzhou, Zhejiang 310009, China

<sup>2</sup>Department of Breast Surgery, The Second Affiliated Hospital, Zhejiang University School of Medicine, Hangzhou, Zhejiang 310009, China

<sup>3</sup>Cancer Center, Zhejiang University, Hangzhou, Zhejiang 310058, China

\*Corresponding author:

Shu Zheng, zhengshu@zju.edu.cn

Cheng Guo, cheng\_guo@zju.edu.cn

Tel.: +86-571-87784501; Fax: +86-571-87214404.

## Table of Content

**Method S1.** Synthesis of stable isotope-labeled 2'-O-methylguanosine, *N*<sup>1</sup>-methylguanosine and 2'-O-methylcytidine.

**Figure S1.** High resolution ESI-MS/MS of (A) 2'-O-methyl-<sup>13</sup>C<sup>15</sup>N<sub>2</sub>-guanosine ([<sup>13</sup>C<sup>15</sup>N<sub>2</sub>]G<sub>m</sub>), (B) *N*<sup>1</sup>-methyl-<sup>13</sup>C<sup>15</sup>N<sub>2</sub>-guanosine ([<sup>13</sup>C<sup>15</sup>N<sub>2</sub>]m<sup>1</sup>G) and (C) 2'-O-methyl-<sup>13</sup>C<sub>5</sub>-cytidine ([<sup>13</sup>C<sub>5</sub>]C<sub>m</sub>).

**Figure S2.** Quantification and statistical analysis results of (A) A<sub>m</sub>, (B) m<sup>6</sup>A, (C) m<sup>1</sup>A, (D) m<sup>6</sup>A<sub>m</sub>, (E) G<sub>m</sub>, (F) m<sup>1</sup>G, (G) C<sub>m</sub>, (H) m<sup>5</sup>C, (I) U<sub>m</sub>, and (J) m<sup>5</sup>U in urine between non-TNBC and TNBC patients. (ns  $p > 0.05$ , \*  $p < 0.05$ , \*\*  $p < 0.001$ )

**Table S1.** The optimized MRM parameters for the analysis of A<sub>m</sub>, m<sup>6</sup>A, m<sup>1</sup>A, m<sup>6</sup>A<sub>m</sub>, G<sub>m</sub>, m<sup>1</sup>G, C<sub>m</sub>, m<sup>5</sup>C, U<sub>m</sub> and m<sup>5</sup>U.

**Table S2.** Limits of detection (LODs) and limits of quantification (LOQs) of A<sub>m</sub>, m<sup>6</sup>A, m<sup>1</sup>A, m<sup>6</sup>A<sub>m</sub>, G<sub>m</sub>, m<sup>1</sup>G, C<sub>m</sub>, m<sup>5</sup>C, U<sub>m</sub> and m<sup>5</sup>U in HILIC-MS/MS when malic acid was used or not.

**Table S3.** The intra- and inter-day accuracy and precision for the determination of A<sub>m</sub>, m<sup>6</sup>A, m<sup>1</sup>A, m<sup>6</sup>A<sub>m</sub>, G<sub>m</sub>, m<sup>1</sup>G, C<sub>m</sub>, m<sup>5</sup>C, U<sub>m</sub> and m<sup>5</sup>U by HILIC-MS/MS method.

**Table S4.** Recoveries of the HILIC-MS/MS method obtained at three different spiking levels.

**Table S5.** Stability of analytes during 72 h at room temperature, 4 °C and -20°C.

**Table S6.** The normalized levels of methylated nucleosides in the urine samples from NC, EBC and LABC patients.

**Table S7.** The concentrations of methylated nucleosides and creatinine in the urine samples from all participants.

**Table S8.** The cutoff values of A<sub>m</sub>, m<sup>6</sup>A, m<sup>1</sup>A, m<sup>6</sup>A<sub>m</sub>, G<sub>m</sub>, m<sup>1</sup>G, C<sub>m</sub> and m<sup>5</sup>C.

**Table S9.** Univariate and multivariate analysis of risk factors of early-stage breast cancer.

**Method S1. Synthesis of stable isotope-labeled 2'-O-methylguanosine, *N*<sup>1</sup>-methylguanosine and 2'-O-methylcytidine.**

Methylation reactions were carried out by treating a mixture of <sup>13</sup>C<sub>5</sub>-guanosine (1 μmol), Me<sub>3</sub>SOH (2 μmol), and copper acetylacetonate (1 μmol) in 1 mL dimethylformamide (DMF) at 70 °C for 1 h. Similarly, methylation reactions of <sup>13</sup>C<sub>5</sub>-cytidine occurred under the same conditions. The solvent was removed, and the resulting crude mixture was dissolved in water, followed by HPLC purification by using a Waters BEH C18 column (2.1 mm × 100 mm, 1.7 μm). The purified 2'-O-methyl-<sup>13</sup>C<sup>15</sup>N<sub>2</sub>-guanosine ([<sup>13</sup>C<sup>15</sup>N<sub>2</sub>]G<sub>m</sub>), *N*<sup>1</sup>-methyl-<sup>13</sup>C<sup>15</sup>N<sub>2</sub>-guanosine ([<sup>13</sup>C<sup>15</sup>N<sub>2</sub>]m<sup>1</sup>G) and 2'-O-methyl-<sup>13</sup>C<sub>5</sub>-cytidine ([<sup>13</sup>C<sub>5</sub>]C<sub>m</sub>) were confirmed by high resolution ESI-MS/MS analysis performed on SCIEX TripleTOF 5600<sup>+</sup> mass spectrometer (Figure S1).

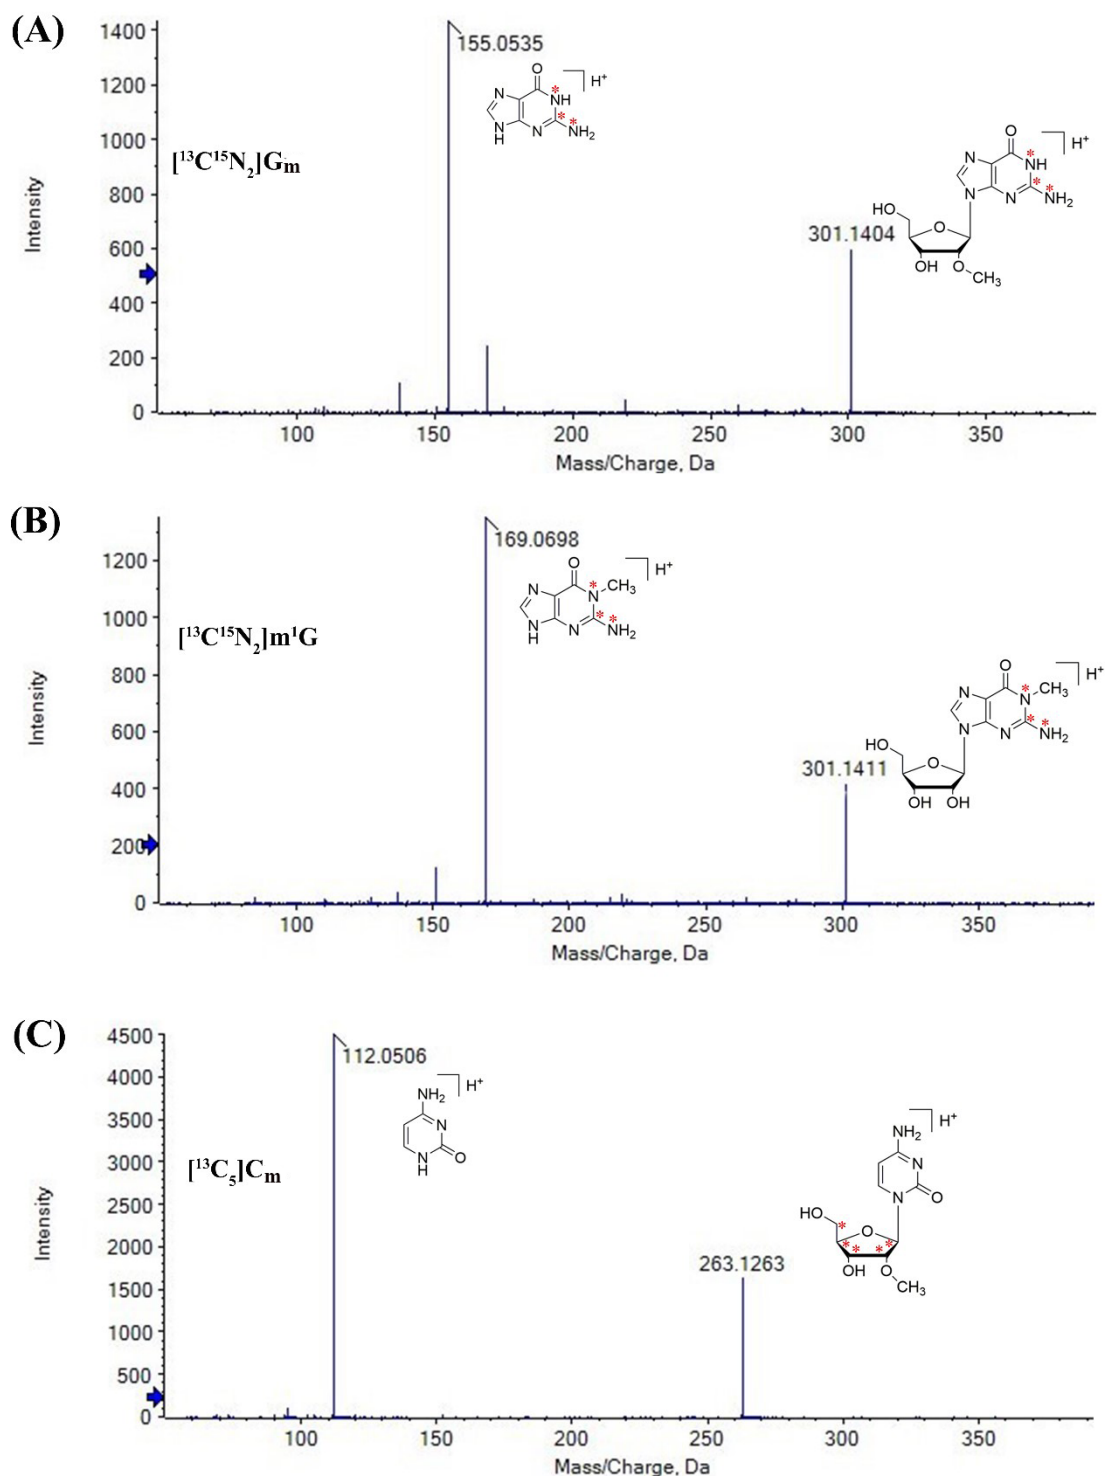

**Figure S1.** High resolution ESI-MS/MS of (A) 2'-O-methyl- $^{13}\text{C}^{15}\text{N}_2$ -guanosine ( $[\text{}^{13}\text{C}^{15}\text{N}_2]\text{G}_\text{m}$ ), (B)  $N^1$ -methyl- $^{13}\text{C}^{15}\text{N}_2$ -guanosine ( $[\text{}^{13}\text{C}^{15}\text{N}_2]\text{m}^1\text{G}$ ) and (C) 2'-O-methyl- $^{13}\text{C}_5$ -cytidine ( $[\text{}^{13}\text{C}_5]\text{C}_\text{m}$ ). The theoretical value of  $[\text{M} + \text{H}]^+$  ion of  $[\text{}^{13}\text{C}^{15}\text{N}_2]\text{G}_\text{m}$ ,  $[\text{}^{13}\text{C}^{15}\text{N}_2]\text{m}^1\text{G}$  and  $[\text{}^{13}\text{C}_5]\text{C}_\text{m}$  is  $m/z$  301.1404, 301.1411 and 263.1263, respectively. For their product ions, the theoretical value of  $[\text{}^{13}\text{C}^{15}\text{N}_2]\text{C}_5\text{H}_6\text{N}_5\text{O}^+$ ,  $[\text{}^{13}\text{C}^{15}\text{N}_2]\text{C}_6\text{H}_8\text{N}_5\text{O}^+$  and  $\text{C}_4\text{H}_6\text{N}_3\text{O}^+$  is 155.0535, 169.0698 and 112.0506, respectively. Asterisk (\*) indicates the site of  $^{13}\text{C}$  or  $^{15}\text{N}$  labeling.

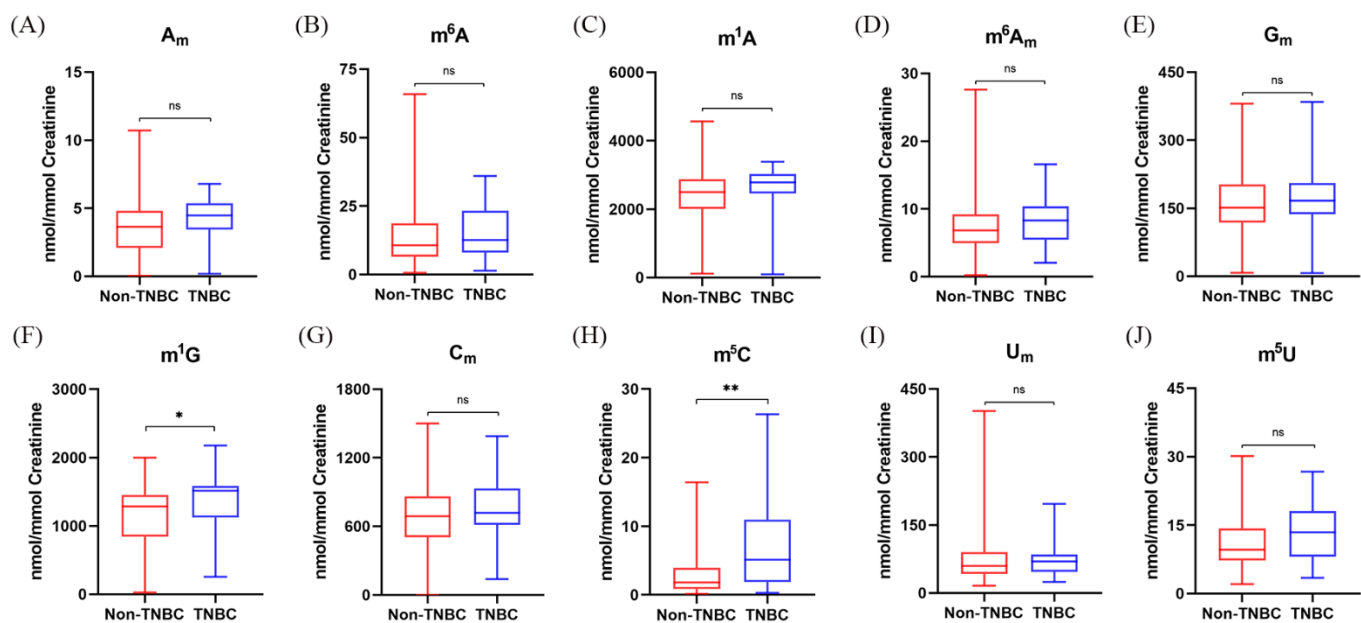

**Figure S2.** Quantification and statistical analysis results of (A)  $A_m$ , (B)  $m^6A$ , (C)  $m^1A$ , (D)  $m^6A_m$ , (E)  $G_m$ , (F)  $m^1G$ , (G)  $C_m$ , (H)  $m^5C$ , (I)  $U_m$ , and (J)  $m^5U$  in urine between non-TNBC and TNBC patients. (ns  $p > 0.05$ , \*  $p < 0.05$ , \*\*  $p < 0.001$ )

**Table S1.** The optimized MRM parameters for the analysis of A<sub>m</sub>, m<sup>6</sup>A, m<sup>1</sup>A, m<sup>6</sup>A<sub>m</sub>, G<sub>m</sub>, m<sup>1</sup>G, C<sub>m</sub>, m<sup>5</sup>C, U<sub>m</sub> and m<sup>5</sup>U.

| Compound                                                         | MRM<br>ion transition ( <i>m/z</i> ) | DP (V) | EP (V) | CE (V) | CXP (V) |
|------------------------------------------------------------------|--------------------------------------|--------|--------|--------|---------|
| A <sub>m</sub>                                                   | 282.1→136.0                          | 50     | 10     | 24     | 10      |
| [ <sup>13</sup> C <sub>5</sub> ]A <sub>m</sub>                   | 287.1→136.0                          | 50     | 12     | 24     | 10      |
| m <sup>6</sup> A                                                 | 282.1→150.0                          | 50     | 12     | 14     | 10      |
| [D <sub>3</sub> ]m <sup>6</sup> A                                | 285.1→153.0                          | 55     | 12     | 14     | 10      |
| m <sup>1</sup> A                                                 | 282.1→150.0                          | 55     | 12     | 14     | 10      |
| [D <sub>3</sub> ]m <sup>1</sup> A                                | 285.1→153.0                          | 55     | 12     | 14     | 10      |
| m <sup>6</sup> A <sub>m</sub>                                    | 296.1→150.0                          | 50     | 10     | 25     | 10      |
| [D <sub>3</sub> ]m <sup>6</sup> A <sub>m</sub>                   | 299.1→153.0                          | 50     | 10     | 25     | 10      |
| G <sub>m</sub>                                                   | 298.1→152.0                          | 50     | 8      | 16     | 12      |
| [ <sup>13</sup> C <sup>15</sup> N <sub>2</sub> ]G <sub>m</sub>   | 301.1→155.0                          | 50     | 8      | 16     | 12      |
| m <sup>1</sup> G                                                 | 298.1→166.0                          | 50     | 8      | 10     | 12      |
| [ <sup>13</sup> C <sup>15</sup> N <sub>2</sub> ]m <sup>1</sup> G | 301.1→169.0                          | 50     | 8      | 18     | 12      |
| C <sub>m</sub>                                                   | 258.1→112.0                          | 45     | 10     | 8      | 8       |
| [ <sup>13</sup> C <sub>5</sub> ]C <sub>m</sub>                   | 263.1→112.0                          | 45     | 10     | 16     | 8       |
| m <sup>5</sup> C                                                 | 258.1→126.0                          | 50     | 10     | 16     | 10      |
| [ <sup>13</sup> C <sub>5</sub> ]m <sup>5</sup> C                 | 263.1→126.0                          | 50     | 10     | 16     | 10      |
| U <sub>m</sub>                                                   | 259.1→113.0                          | 45     | 6      | 16     | 16      |
| [D <sub>3</sub> ]U <sub>m</sub>                                  | 262.1→113.0                          | 45     | 6      | 16     | 16      |
| m <sup>5</sup> U                                                 | 259.1→127.0                          | 55     | 10     | 16     | 14      |
| [ <sup>13</sup> C <sub>5</sub> ]m <sup>5</sup> U                 | 264.1→127.0                          | 55     | 10     | 16     | 14      |

*DP* declustering potential, *CE* collision energy, *EP* entrance potential, *CXP* collision cell exit potential.

**Table S2.** Limits of detection (LODs) and limits of quantification (LOQs) of A<sub>m</sub>, m<sup>6</sup>A, m<sup>1</sup>A, m<sup>6</sup>A<sub>m</sub>, G<sub>m</sub>, m<sup>1</sup>G, C<sub>m</sub>, m<sup>5</sup>C, U<sub>m</sub> and m<sup>5</sup>U in HILIC-MS/MS when malic acid was used or not.

|                               | LOD                       |                        | LOQ                       |                        |
|-------------------------------|---------------------------|------------------------|---------------------------|------------------------|
|                               | without malic acid (fmol) | with malic acid (fmol) | without malic acid (fmol) | with malic acid (fmol) |
| A <sub>m</sub>                | 0.25                      | 0.1                    | 1                         | 0.25                   |
| m <sup>6</sup> A              | 0.25                      | 0.05                   | 1                         | 0.25                   |
| m <sup>1</sup> A              | 0.25                      | 0.05                   | 1                         | 0.1                    |
| m <sup>6</sup> A <sub>m</sub> | 0.25                      | 0.05                   | 1                         | 0.25                   |
| G <sub>m</sub>                | 0.25                      | 0.05                   | 1                         | 0.1                    |
| m <sup>1</sup> G              | 0.5                       | 0.1                    | 2.5                       | 0.5                    |
| C <sub>m</sub>                | 0.1                       | 0.05                   | 0.5                       | 0.25                   |
| m <sup>5</sup> C              | 0.25                      | 0.05                   | 1                         | 0.5                    |
| U <sub>m</sub>                | 1                         | 0.5                    | 5                         | 1                      |
| m <sup>5</sup> U              | 2.5                       | 1                      | 10                        | 2.5                    |

**Table S3.** The intra- and inter-day accuracy and precision for the determination of A<sub>m</sub>, m<sup>6</sup>A, m<sup>1</sup>A, m<sup>6</sup>A<sub>m</sub>, G<sub>m</sub>, m<sup>1</sup>G, C<sub>m</sub>, m<sup>5</sup>C, U<sub>m</sub> and m<sup>5</sup>U by HILIC-MS/MS method.

| QC                            | Theoretical values (nM) | Intra-day (n = 9) |         |              | Inter-day (n = 3) |         |              |
|-------------------------------|-------------------------|-------------------|---------|--------------|-------------------|---------|--------------|
|                               |                         | Mean ± SD (nM)    | RSD (%) | Accuracy (%) | Mean ± SD (nM)    | RSD (%) | Accuracy (%) |
| A <sub>m</sub>                | 1 (Low)                 | 0.95 ± 0.09       | 9.62    | 94.67        | 0.91 ± 0.01       | 1.38    | 90.54        |
|                               | 5 (Medium)              | 4.82 ± 0.43       | 8.92    | 96.41        | 4.80 ± 0.22       | 4.50    | 95.99        |
|                               | 50 (High)               | 51.09 ± 1.27      | 2.48    | 102.19       | 50.87 ± 1.30      | 2.55    | 101.75       |
| m <sup>6</sup> A              | 40 (Low)                | 36.1 ± 1.1        | 3.05    | 90.18        | 36.5 ± 0.4        | 1.19    | 91.28        |
|                               | 400 (Medium)            | 419.6 ± 13.7      | 3.27    | 104.89       | 417.0 ± 6.4       | 1.52    | 104.24       |
|                               | 2000 (High)             | 1987.7 ± 45.7     | 2.30    | 99.38        | 1996.2 ± 39.1     | 1.96    | 99.81        |
| m <sup>1</sup> A              | 200 (Low)               | 185.0 ± 9.0       | 4.87    | 92.50        | 183.7 ± 7.5       | 4.10    | 91.85        |
|                               | 2000 (Medium)           | 2107.5 ± 98.5     | 4.67    | 105.38       | 2083.9 ± 78.7     | 3.78    | 104.19       |
|                               | 6000 (High)             | 6019 ± 252.9      | 4.20    | 100.33       | 5940 ± 300.0      | 5.05    | 99.01        |
| m <sup>6</sup> A <sub>m</sub> | 4 (Low)                 | 4.20 ± 0.10       | 2.41    | 104.88       | 4.22 ± 0.10       | 2.34    | 105.62       |
|                               | 20 (Medium)             | 21.89 ± 0.49      | 2.25    | 109.44       | 21.87 ± 0.48      | 2.20    | 109.35       |
|                               | 200 (High)              | 191.18 ± 4.19     | 2.19    | 95.59        | 191.55 ± 4.03     | 2.10    | 95.77        |
| G <sub>m</sub>                | 10 (Low)                | 9.31 ± 0.37       | 3.94    | 93.09        | 9.52 ± 0.31       | 3.25    | 95.22        |
|                               | 100 (Medium)            | 94.15 ± 3.19      | 3.39    | 94.15        | 94.28 ± 2.35      | 2.49    | 94.28        |
|                               | 500 (High)              | 457.1 ± 20.53     | 4.49    | 91.41        | 467.12 ± 29.00    | 6.21    | 93.42        |
| m <sup>1</sup> G              | 100 (Low)               | 93.5 ± 4.4        | 4.75    | 93.46        | 93.8 ± 3.6        | 3.80    | 93.76        |
|                               | 1000 (Medium)           | 1045.6 ± 19.0     | 1.82    | 104.56       | 1047.5 ± 14.0     | 1.34    | 104.75       |
|                               | 5000 (High)             | 4894.2 ± 74.0     | 1.51    | 97.88        | 4893.1 ± 87.3     | 1.78    | 97.86        |
| C <sub>m</sub>                | 50 (Low)                | 47.5 ± 2.1        | 4.53    | 93.01        | 47.3 ± 1.1        | 2.24    | 94.58        |
|                               | 500 (Medium)            | 543.4 ± 15.1      | 2.78    | 108.68       | 547.1 ± 6.5       | 1.19    | 109.42       |
|                               | 2500 (High)             | 2652.5 ± 46.4     | 1.75    | 106.10       | 2653.7 ± 52.4     | 1.98    | 106.15       |
| m <sup>5</sup> C              | 1 (Low)                 | 0.91 ± 0.05       | 5.55    | 90.84        | 0.91 ± 0.06       | 6.18    | 90.64        |
|                               | 5 (Medium)              | 4.75 ± 0.25       | 5.20    | 94.93        | 4.81 ± 0.13       | 2.77    | 96.26        |
|                               | 50 (High)               | 46.06 ± 2.81      | 6.11    | 92.12        | 46.13 ± 3.55      | 7.69    | 92.25        |
| U <sub>m</sub>                | 10 (Low)                | 10.95 ± 0.36      | 3.30    | 109.48       | 10.93 ± 0.53      | 4.84    | 109.25       |
|                               | 100 (Medium)            | 107.63 ± 6.57     | 6.10    | 107.63       | 106.18 ± 7.77     | 7.31    | 106.18       |
|                               | 500 (High)              | 500.9 ± 24.95     | 4.98    | 100.19       | 493.56 ± 28.03    | 5.68    | 98.71        |
| m <sup>5</sup> U              | 2 (Low)                 | 2.11 ± 0.13       | 6.37    | 105.26       | 2.08 ± 0.15       | 7.30    | 103.90       |
|                               | 20 (Medium)             | 21.91 ± 0.96      | 4.40    | 109.55       | 21.98 ± 0.56      | 2.55    | 109.91       |
|                               | 100 (High)              | 104.59 ± 8.33     | 7.96    | 104.59       | 101.63 ± 6.99     | 6.89    | 101.63       |



**Table S4.** Recoveries of the HILIC-MS/MS method obtained at three different spiking levels.

|                               | <b>Added amount<br/>(nM)</b> | <b>Mean <math>\pm</math> SD<br/>(nM)</b> | <b>Average recovery (%)</b> | <b>RSD (%)</b> |
|-------------------------------|------------------------------|------------------------------------------|-----------------------------|----------------|
| A <sub>m</sub>                | 0                            | 7.49 $\pm$ 0.21                          | -                           | 2.85           |
|                               | 1 (Low)                      | 8.50 $\pm$ 0.46                          | 101.33                      | 5.45           |
|                               | 5 (Medium)                   | 13.23 $\pm$ 0.32                         | 114.75                      | 2.44           |
|                               | 50 (High)                    | 64.34 $\pm$ 0.10                         | 113.70                      | 0.16           |
| m <sup>6</sup> A              | 0                            | 488.7 $\pm$ 14.7                         | -                           | 3.01           |
|                               | 20 (Low)                     | 510.5 $\pm$ 6.0                          | 108.86                      | 1.18           |
|                               | 200 (Medium)                 | 676.2 $\pm$ 11.1                         | 93.75                       | 1.65           |
|                               | 1000 (High)                  | 1482.2 $\pm$ 11.3                        | 99.34                       | 0.76           |
| m <sup>1</sup> A              | 0                            | 3382.6 $\pm$ 160.9                       | -                           | 4.76           |
|                               | 100 (Low)                    | 3486.4 $\pm$ 36.4                        | 103.86                      | 1.04           |
|                               | 1000 (Medium)                | 4313.5 $\pm$ 177.6                       | 93.09                       | 4.12           |
|                               | 5000 (High)                  | 8434.9 $\pm$ 517.1                       | 101.05                      | 6.13           |
| m <sup>6</sup> A <sub>m</sub> | 0                            | 18.51 $\pm$ 0.44                         | -                           | 2.37           |
|                               | 4 (Low)                      | 23.06 $\pm$ 0.37                         | 113.72                      | 1.58           |
|                               | 20 (Medium)                  | 40.49 $\pm$ 0.74                         | 109.94                      | 1.83           |
|                               | 200 (High)                   | 236.52 $\pm$ 6.95                        | 109.00                      | 2.94           |
| G <sub>m</sub>                | 0                            | 138.75 $\pm$ 1.50                        | -                           | 1.08           |
|                               | 10 (Low)                     | 148.34 $\pm$ 4.48                        | 95.84                       | 3.02           |
|                               | 100 (Medium)                 | 237.15 $\pm$ 7.44                        | 98.40                       | 3.14           |
|                               | 500 (High)                   | 601.56 $\pm$ 2.36                        | 92.56                       | 0.39           |
| m <sup>1</sup> G              | 0                            | 1245.5 $\pm$ 20.9                        | -                           | 1.68           |
|                               | 100 (Low)                    | 1349.3 $\pm$ 31.4                        | 103.81                      | 2.33           |
|                               | 1000 (Medium)                | 2264.8 $\pm$ 45.8                        | 101.93                      | 2.02           |
|                               | 5000 (High)                  | 6263.5 $\pm$ 59.1                        | 100.36                      | 0.94           |
| C <sub>m</sub>                | 0                            | 648.4 $\pm$ 5.0                          | -                           | 0.77           |
|                               | 50 (Low)                     | 695.4 $\pm$ 8.6                          | 93.79                       | 1.24           |
|                               | 500 (Medium)                 | 1169.1 $\pm$ 6.7                         | 104.13                      | 0.57           |
|                               | 2500 (High)                  | 3256.8 $\pm$ 29.6                        | 104.34                      | 0.91           |
| m <sup>5</sup> C              | 0                            | 5.76 $\pm$ 0.18                          | -                           | 3.09           |
|                               | 1 (Low)                      | 6.85 $\pm$ 0.49                          | 108.28                      | 7.19           |
|                               | 5 (Medium)                   | 10.84 $\pm$ 0.95                         | 101.55                      | 8.77           |
|                               | 50 (High)                    | 58.35 $\pm$ 4.70                         | 105.18                      | 8.06           |
| U <sub>m</sub>                | 0                            | 152.42 $\pm$ 12.53                       | -                           | 8.22           |
|                               | 10 (Low)                     | 163.34 $\pm$ 9.20                        | 109.21                      | 5.63           |
|                               | 100 (Medium)                 | 247.90 $\pm$ 6.19                        | 95.47                       | 2.50           |
|                               | 500 (High)                   | 650.03 $\pm$ 8.50                        | 90.51                       | 1.31           |
| m <sup>5</sup> U              | 0                            | 34.81 $\pm$ 3.48                         | -                           | 9.98           |
|                               | 2 (Low)                      | 36.96 $\pm$ 1.77                         | 107.87                      | 4.79           |
|                               | 20 (Medium)                  | 60.07 $\pm$ 5.81                         | 95.15                       | 9.83           |
|                               | 100 (High)                   | 153.47 $\pm$ 9.19                        | 106.44                      | 5.99           |

**Table S5.** Stability of analytes during 72 h at room temperature, 4 °C and -20°C.

| Compound                      | Temperature | Room temperature |     |     | 4°C |     |     | -20°C |     |     |
|-------------------------------|-------------|------------------|-----|-----|-----|-----|-----|-------|-----|-----|
|                               | Time (h)    | 24               | 48  | 72  | 24  | 48  | 72  | 24    | 48  | 72  |
| A <sub>m</sub>                | Low         | 97 <sup>a</sup>  | 97  | 98  | 101 | 97  | 97  | 96    | 100 | 97  |
|                               | Medium      | 101              | 98  | 99  | 103 | 104 | 100 | 99    | 99  | 98  |
|                               | High        | 102              | 97  | 97  | 98  | 99  | 99  | 96    | 101 | 104 |
| m <sup>6</sup> A              | Low         | 100              | 96  | 98  | 101 | 98  | 101 | 96    | 102 | 96  |
|                               | Medium      | 101              | 101 | 98  | 97  | 101 | 102 | 100   | 97  | 98  |
|                               | High        | 101              | 99  | 96  | 102 | 99  | 99  | 103   | 100 | 103 |
| m <sup>1</sup> A              | Low         | 96               | 97  | 100 | 98  | 103 | 97  | 99    | 102 | 98  |
|                               | Medium      | 101              | 96  | 97  | 101 | 100 | 102 | 102   | 97  | 98  |
|                               | High        | 99               | 97  | 96  | 103 | 100 | 99  | 97    | 103 | 102 |
| m <sup>6</sup> A <sub>m</sub> | Low         | 99               | 100 | 97  | 100 | 96  | 98  | 96    | 103 | 97  |
|                               | Medium      | 100              | 96  | 96  | 100 | 103 | 101 | 99    | 98  | 98  |
|                               | High        | 99               | 100 | 97  | 101 | 96  | 98  | 100   | 97  | 102 |
| G <sub>m</sub>                | Low         | 102              | 96  | 100 | 98  | 99  | 97  | 98    | 99  | 96  |
|                               | Medium      | 98               | 97  | 97  | 99  | 101 | 102 | 97    | 99  | 98  |
|                               | High        | 99               | 97  | 97  | 103 | 100 | 98  | 99    | 101 | 101 |
| m <sup>1</sup> G              | Low         | 99               | 97  | 103 | 98  | 96  | 98  | 98    | 101 | 98  |
|                               | Medium      | 100              | 96  | 100 | 99  | 101 | 102 | 97    | 98  | 97  |
|                               | High        | 100              | 97  | 97  | 102 | 100 | 100 | 99    | 103 | 103 |
| C <sub>m</sub>                | Low         | 99               | 100 | 99  | 102 | 98  | 100 | 98    | 104 | 96  |
|                               | Medium      | 100              | 101 | 100 | 99  | 103 | 103 | 103   | 101 | 101 |
|                               | High        | 100              | 96  | 96  | 100 | 97  | 98  | 99    | 102 | 101 |
| m <sup>5</sup> C              | Low         | 97               | 101 | 103 | 101 | 97  | 102 | 96    | 101 | 103 |
|                               | Medium      | 102              | 99  | 103 | 101 | 103 | 103 | 99    | 101 | 99  |
|                               | High        | 98               | 97  | 97  | 100 | 101 | 98  | 99    | 102 | 102 |
| U <sub>m</sub>                | Low         | 102              | 100 | 100 | 103 | 101 | 97  | 98    | 98  | 98  |
|                               | Medium      | 100              | 104 | 98  | 101 | 104 | 99  | 100   | 101 | 102 |
|                               | High        | 99               | 100 | 103 | 103 | 104 | 98  | 98    | 103 | 104 |
| m <sup>5</sup> U              | Low         | 100              | 103 | 100 | 97  | 101 | 98  | 100   | 102 | 101 |
|                               | Medium      | 101              | 98  | 99  | 104 | 98  | 102 | 103   | 96  | 104 |
|                               | High        | 96               | 99  | 97  | 102 | 101 | 98  | 102   | 101 | 99  |

<sup>a</sup> All values were expressed as percentages, and the concentration of fresh samples at 0 h were considered as 100%.

**Table S6.** The normalized levels of methylated nucleosides in the urine samples from NC, EBC and LABC patients.

|      |      | A <sub>m</sub>    | m <sup>6</sup> A | m <sup>1</sup> A | m <sup>6</sup> A <sub>m</sub> | G <sub>m</sub> | m <sup>1</sup> G | C <sub>m</sub> | m <sup>5</sup> C | U <sub>m</sub> | m <sup>5</sup> U |
|------|------|-------------------|------------------|------------------|-------------------------------|----------------|------------------|----------------|------------------|----------------|------------------|
| NC   | Mean | 4.95 <sup>a</sup> | 29.67            | 2840             | 8.55                          | 204.8          | 1458             | 793.2          | 5.12             | 67.41          | 9.86             |
|      | SD   | 0.24              | 5.16             | 96               | 0.48                          | 11.3           | 50               | 33.8           | 0.49             | 6.32           | 0.53             |
| EBC  | Mean | 3.27              | 27.81            | 2373             | 7.30                          | 160.8          | 1109             | 674.4          | 3.17             | 79.15          | 11.29            |
|      | SD   | 0.17              | 8.40             | 77               | 0.36                          | 6.5            | 45               | 25.1           | 0.30             | 7.11           | 0.57             |
| LABC | Mean | 4.52              | 45.31            | 2514             | 8.61                          | 196.1          | 1320             | 804.2          | 4.40             | 92.12          | 13.05            |
|      | SD   | 0.58              | 18.33            | 103              | 0.51                          | 11.2           | 63               | 37.1           | 0.61             | 8.71           | 1.28             |

<sup>a</sup>nmol/mmol Cr  
SD: standard deviation, NC: normal control, EBC: early-stage breast cancer, LABC: locally advanced breast cancer

**Table S7.** The concentrations of methylated nucleosides and creatinine in the urine samples from all participants. (ND: Not Detected, B: Breast Cancer, N: Normal)

| No. | Cr ( $\mu\text{M}$ ) | A <sub>m</sub> (nM) | m <sup>6</sup> A (nM) | m <sup>6</sup> A <sub>m</sub> (nM) | m <sup>1</sup> A (nM) | G <sub>m</sub> (nM) | m <sup>1</sup> G (nM) | C <sub>m</sub> (nM) | m <sup>5</sup> C (nM) | U <sub>m</sub> (nM) | m <sup>5</sup> U (nM) |
|-----|----------------------|---------------------|-----------------------|------------------------------------|-----------------------|---------------------|-----------------------|---------------------|-----------------------|---------------------|-----------------------|
| B1  | 18414                | 73.2 $\pm$ 3.9      | 254.4 $\pm$ 14.3      | 109.7 $\pm$ 0.9                    | 43052 $\pm$ 210       | 2028 $\pm$ 25       | 23687 $\pm$ 209       | 11832 $\pm$ 531     | 39 $\pm$ 2.4          | 637.3 $\pm$ 21      | 100.5 $\pm$ 2.3       |
| B2  | 8277                 | 45.9 $\pm$ 0.6      | 429.6 $\pm$ 2         | 80.2 $\pm$ 1.8                     | 17526 $\pm$ 1207      | 1224 $\pm$ 30       | 9999 $\pm$ 36         | 4627 $\pm$ 54       | 7.7 $\pm$ 0.4         | 348.5 $\pm$ 16.8    | 117.7 $\pm$ 9.7       |
| B3  | 4272                 | 13.7 $\pm$ 1        | 19.9 $\pm$ 1.8        | 28.4 $\pm$ 0                       | 6195 $\pm$ 544        | 506 $\pm$ 20        | 127 $\pm$ 2           | 1859 $\pm$ 16       | 19.1 $\pm$ 1.9        | 184.2 $\pm$ 16.4    | 93 $\pm$ 6.2          |
| B4  | 15502                | 54.2 $\pm$ 3.7      | 708.2 $\pm$ 10        | 76.2 $\pm$ 0.1                     | 26081 $\pm$ 39        | 2293 $\pm$ 12       | 13142 $\pm$ 128       | 8851 $\pm$ 15       | 23.8 $\pm$ 2.2        | 701.1 $\pm$ 58.7    | 209.6 $\pm$ 4.1       |
| B5  | 3341                 | 13.7 $\pm$ 0.7      | 147.5 $\pm$ 7.7       | 26.6 $\pm$ 0.1                     | 6399 $\pm$ 114        | 529 $\pm$ 4         | 3053 $\pm$ 70         | 1899 $\pm$ 6        | 9.6 $\pm$ 0.2         | 171.3 $\pm$ 15      | 32.2 $\pm$ 2.6        |
| B6  | 13872                | 44.7 $\pm$ 2.8      | 202 $\pm$ 2.2         | 70.5 $\pm$ 2.3                     | 28747 $\pm$ 59        | 1877 $\pm$ 36       | 14441 $\pm$ 199       | 6271 $\pm$ 74       | 5.6 $\pm$ 0.4         | 334.6 $\pm$ 15.6    | 111.5 $\pm$ 6.4       |
| B7  | 17088                | 47.9 $\pm$ 2.2      | 54.6 $\pm$ 4.7        | 109 $\pm$ 1.5                      | 39229 $\pm$ 310       | 2232 $\pm$ 43       | 18596 $\pm$ 352       | 9332 $\pm$ 299      | 8.5 $\pm$ 0.4         | 3114.1 $\pm$ 115.4  | 233 $\pm$ 15.6        |
| B8  | 8973                 | 55.9 $\pm$ 1.1      | 12.8 $\pm$ 0.2        | 133.9 $\pm$ 1                      | 5661 $\pm$ 199        | 2706 $\pm$ 28       | ND                    | 10908 $\pm$ 162     | 38 $\pm$ 3.5          | 706 $\pm$ 36.6      | 87 $\pm$ 3.6          |
| B9  | 6696                 | 18.9 $\pm$ 0.3      | 16.7 $\pm$ 0.8        | 37.7 $\pm$ 0.7                     | 5944 $\pm$ 291        | 861 $\pm$ 4         | ND                    | 3180 $\pm$ 25       | 36.9 $\pm$ 1.6        | 361 $\pm$ 3         | 66.6 $\pm$ 1.3        |
| B10 | 3706                 | 1.9 $\pm$ 0.1       | 12.9 $\pm$ 0.8        | 38.3 $\pm$ 0.3                     | ND                    | 155 $\pm$ 11        | ND                    | 3118 $\pm$ 18       | 2.5 $\pm$ 0.1         | 672.2 $\pm$ 46.7    | 48.7 $\pm$ 9.6        |
| B11 | 8537                 | 20.8 $\pm$ 0.5      | 5.2 $\pm$ 0.1         | 43.2 $\pm$ 0.6                     | ND                    | 900 $\pm$ 40        | ND                    | 3505 $\pm$ 76       | 6 $\pm$ 0.5           | 322.6 $\pm$ 23.1    | 34 $\pm$ 0.6          |
| B12 | 6261                 | 2.6 $\pm$ 0.2       | 54.6 $\pm$ 1.5        | 26.1 $\pm$ 0.8                     | 2871 $\pm$ 161        | 835 $\pm$ 13        | 5170 $\pm$ 147        | 3166 $\pm$ 118      | 9.8 $\pm$ 0.3         | 359.7 $\pm$ 23.5    | 78.7 $\pm$ 7.3        |
| B13 | 1563                 | 8 $\pm$ 0.5         | 2485.4 $\pm$ 6.2      | 17.5 $\pm$ 0.5                     | 2082 $\pm$ 46         | 320 $\pm$ 3         | 2217 $\pm$ 58         | 1779 $\pm$ 1        | 12.6 $\pm$ 1.1        | 192.7 $\pm$ 3.5     | 163.1 $\pm$ 6.2       |
| B14 | 19447                | 89.6 $\pm$ 4.1      | 400 $\pm$ 18.7        | 118.4 $\pm$ 2.5                    | 49366 $\pm$ 1280      | 3161 $\pm$ 68       | 29437 $\pm$ 557       | 16466 $\pm$ 116     | 11.1 $\pm$ 0.1        | 1091.7 $\pm$ 16.3   | 193.4 $\pm$ 7.9       |
| B15 | 11093                | 63.3 $\pm$ 2.3      | 909.1 $\pm$ 17.7      | 93.5 $\pm$ 3.2                     | 32972 $\pm$ 455       | 2515 $\pm$ 10       | 19600 $\pm$ 578       | 8401 $\pm$ 360      | 14.1 $\pm$ 1.2        | 728.6 $\pm$ 36.5    | 148.5 $\pm$ 0.3       |
| B16 | 2702                 | 9.4 $\pm$ 0.6       | 6.9 $\pm$ 0.3         | 30.1 $\pm$ 1                       | ND                    | 428 $\pm$ 4         | ND                    | 2070 $\pm$ 22       | 3.5 $\pm$ 0.2         | 288.3 $\pm$ 25      | 41.6 $\pm$ 0.7        |
| B17 | 3154                 | 13.7 $\pm$ 1.1      | 25.6 $\pm$ 1.7        | 24.4 $\pm$ 0.1                     | 7398 $\pm$ 22         | 469 $\pm$ 13        | 543 $\pm$ 12          | 1512 $\pm$ 5        | 9.3 $\pm$ 0.5         | 149.9 $\pm$ 5.8     | 80.5 $\pm$ 5.9        |
| B18 | 3941                 | 0.6 $\pm$ 0         | 63.5 $\pm$ 1.9        | 0.9 $\pm$ 0                        | ND                    | 31 $\pm$ 2          | 123 $\pm$ 2           | 716 $\pm$ 45        | 2.4 $\pm$ 0.2         | 135.6 $\pm$ 1       | 16.2 $\pm$ 1          |
| B19 | 11958                | 63.5 $\pm$ 2.8      | 1011.6 $\pm$ 13.7     | 111.8 $\pm$ 4.7                    | 25092 $\pm$ 1244      | 2419 $\pm$ 23       | 13994 $\pm$ 93        | 8745 $\pm$ 23       | 4.2 $\pm$ 0.2         | 619.8 $\pm$ 20.4    | 98.8 $\pm$ 3.5        |
| B20 | 17880                | 43.3 $\pm$ 3.7      | 13.3 $\pm$ 0.8        | 141.2 $\pm$ 10.5                   | 3642 $\pm$ 244        | 2497 $\pm$ 8        | ND                    | 11147 $\pm$ 8       | 45.5 $\pm$ 0.5        | 734 $\pm$ 29.9      | 58.7 $\pm$ 1.6        |
| B21 | 20983                | 66.8 $\pm$ 5.8      | 803.7 $\pm$ 20.6      | 140.4 $\pm$ 3.1                    | 40023 $\pm$ 623       | 1821 $\pm$ 1        | 21903 $\pm$ 138       | 12043 $\pm$ 155     | 29 $\pm$ 0            | 1039.4 $\pm$ 92.1   | 178.7 $\pm$ 0.9       |
| B22 | 11202                | 50.1 $\pm$ 0.7      | 408.1 $\pm$ 1.5       | 112.1 $\pm$ 0.1                    | 20808 $\pm$ 149       | 2681 $\pm$ 16       | 13988 $\pm$ 39        | 11115 $\pm$ 147     | 11.5 $\pm$ 0.3        | 806.6 $\pm$ 5       | 165.4 $\pm$ 12        |
| B23 | 13313                | 38.6 $\pm$ 1.1      | 20 $\pm$ 1.2          | 98.2 $\pm$ 0                       | 9087 $\pm$ 590        | 2336 $\pm$ 34       | ND                    | 9323 $\pm$ 256      | 8.7 $\pm$ 0.8         | 426.6 $\pm$ 32.5    | 75.7 $\pm$ 3.4        |
| B24 | 23251                | 173.6 $\pm$ 0.6     | 437.8 $\pm$ 1.8       | 343.1 $\pm$ 31.9                   | 56220 $\pm$ 3590      | 6719 $\pm$ 93       | 18124 $\pm$ 535       | 28417 $\pm$ 566     | 46 $\pm$ 3.3          | 2619.6 $\pm$ 202.2  | 291.1 $\pm$ 11.4      |
| B25 | 6807                 | 25 $\pm$ 0.4        | 131.9 $\pm$ 0.3       | 50.2 $\pm$ 0.2                     | 20747 $\pm$ 576       | 1212 $\pm$ 24       | 10193 $\pm$ 65        | 5618 $\pm$ 74       | 106.5 $\pm$ 7         | 582.7 $\pm$ 58.9    | 96.8 $\pm$ 5.8        |
| B26 | 12929                | 54 $\pm$ 2.6        | 270.2 $\pm$ 7.7       | 73 $\pm$ 0.8                       | 39548 $\pm$ 1624      | 1959 $\pm$ 42       | 18670 $\pm$ 16        | 8071 $\pm$ 28       | 29.4 $\pm$ 2.1        | 413 $\pm$ 8         | 125.3 $\pm$ 3.2       |
| B27 | 4051                 | 19.7 $\pm$ 1.7      | 96.2 $\pm$ 0.1        | 21.1 $\pm$ 0.3                     | 11702 $\pm$ 96        | 632 $\pm$ 8         | 5575 $\pm$ 21         | 2358 $\pm$ 23       | 12.4 $\pm$ 0.5        | 127.6 $\pm$ 7.4     | 33.3 $\pm$ 1.4        |
| B28 | 7169                 | 35 $\pm$ 2.6        | 3110.4 $\pm$ 102.5    | 73.4 $\pm$ 1.6                     | 13482 $\pm$ 306       | 1873 $\pm$ 10       | 9819 $\pm$ 54         | 5282 $\pm$ 2        | 19.8 $\pm$ 1.7        | 369.6 $\pm$ 18.5    | 105.4 $\pm$ 0.1       |
| B29 | 5716                 | 9.7 $\pm$ 0.1       | 6.9 $\pm$ 0.1         | 47.8 $\pm$ 1.1                     | ND                    | 931 $\pm$ 0         | ND                    | 2998 $\pm$ 23       | 3.2 $\pm$ 0.2         | 289.3 $\pm$ 5.7     | 49 $\pm$ 1.2          |
| B30 | 5459                 | 13.4 $\pm$ 0.6      | 90.8 $\pm$ 1          | 58.5 $\pm$ 0.5                     | 9835 $\pm$ 225        | 1342 $\pm$ 21       | 2337 $\pm$ 5          | 2461 $\pm$ 78       | 5.9 $\pm$ 0.4         | 1127.8 $\pm$ 48.7   | 53.9 $\pm$ 0.4        |
| B31 | 4408                 | 17 $\pm$ 0.6        | 4359.2 $\pm$ 114.4    | 49 $\pm$ 1.6                       | 2618 $\pm$ 216        | 1063 $\pm$ 9        | 2465 $\pm$ 75         | 3674 $\pm$ 39       | 7.6 $\pm$ 0.6         | 230.7 $\pm$ 10.8    | 68.6 $\pm$ 6.2        |

|     |       |           |             |           |            |         |           |           |          |              |            |
|-----|-------|-----------|-------------|-----------|------------|---------|-----------|-----------|----------|--------------|------------|
| B32 | 5213  | 20.7±1.1  | 6.2±0       | 31.4±0.8  | 19±1       | 634±11  | ND        | 2825±12   | 9.3±0.2  | 352±6.3      | 40.6±2.3   |
| B33 | 4906  | 0.7±0     | 44.9±1.6    | 18±0.4    | ND         | 484±8   | 118±20    | 213±2     | 12.5±1   | 1353.2±106.4 | 33.2±1.4   |
| B34 | 7253  | 13.4±0    | 414.7±28.2  | 55.1±0.3  | 3825±121   | 705±1   | 1919±17   | 3989±109  | 11.4±0.3 | 418.9±12.5   | 74.9±7.1   |
| B35 | 11272 | 2.3±0     | 7.7±0.3     | 53.3±1.5  | ND         | 1476±1  | ND        | 6035±152  | 7.4±0.6  | 723.4±29.1   | 30.7±2.9   |
| B36 | 19549 | 55±1.7    | 107±2.9     | 91±0.1    | 48836±1681 | 2260±3  | 27161±80  | 12858±121 | 47.7±2.8 | 1077.8±6.6   | 192.7±15.2 |
| B37 | 18066 | 94.9±6.8  | 168.2±0.6   | 236.8±2.8 | 46640±718  | 6373±99 | 24954±777 | 21844±155 | 9.9±0.9  | 1519.6±97.3  | 173.8±13.6 |
| B38 | 7158  | 15.8±0.4  | 64.8±2.2    | 16.3±0.2  | 14178±664  | 724±15  | 5843±45   | 3880±125  | 78.6±2.7 | 249.4±17.7   | 96.1±9.2   |
| B39 | 21145 | 56.1±1.7  | 134.2±7.2   | 105.6±3   | 49627±901  | 2749±23 | 26211±193 | 12219±178 | 59.9±3.2 | 344.5±9.3    | 181.5±3.2  |
| B40 | 3979  | 0.7±0     | 22.7±2.3    | 22±0.1    | ND         | 26±2    | ND        | 2593±7    | 20.8±0.7 | 321.7±29.1   | 58.2±1.2   |
| B41 | 1952  | 12.9±0.4  | 30.6±1      | 28±0.7    | 6590±384   | 552±3   | 3100±28   | 1789±14   | 9.9±0.4  | 187.6±16.5   | 52.2±2.9   |
| B42 | 6050  | 15±0.3    | 382.1±14.8  | 34.2±1.4  | 14413±802  | 582±18  | 487±6     | 3208±31   | 69.5±4.7 | 252.6±3.6    | 68.3±3     |
| B43 | 4061  | 16.8±0.7  | 91.9±1      | 21.1±0.2  | 12004±162  | 586±18  | 5910±184  | 2130±43   | 31.2±2.7 | 202.4±8.6    | 49.8±4.8   |
| B44 | 4093  | 1.4±0.1   | 218.9±2.5   | 10.3±0.2  | 4049±74    | 784±3   | 3441±21   | 2553±37   | 5.3±0.3  | 184.9±7.4    | 31.1±1.1   |
| B45 | 20549 | 90.8±0.1  | 252.4±3.5   | 100±3.1   | 57313±770  | 3399±95 | 32146±165 | 15044±126 | 84.6±6.1 | 862.6±0.6    | 188.3±11.3 |
| B46 | 8006  | 8.5±0.3   | 11.4±0.2    | 43.5±2.3  | 770±15     | 796±25  | ND        | 4377±35   | 3±0.1    | 618.2±43.8   | 27.4±0.9   |
| B47 | 5041  | 30.4±1.2  | 588.2±5.8   | 72.4±1.9  | 10858±82   | 1250±17 | 6936±13   | 4915±129  | 35.8±2.1 | 433.5±0.8    | 88.4±6.6   |
| B48 | 8601  | 20.2±0.2  | 7.4±0.4     | 39.7±0.7  | 1627±14    | 827±11  | ND        | 3590±57   | 5.2±0    | 361.7±2.8    | 122.3±9.8  |
| B49 | 24600 | 89.5±0    | 787.9±17    | 178.2±5.1 | 46656±2052 | 3904±42 | 23553±252 | 17297±58  | 14.1±0.3 | 1528.7±46.5  | 212.6±14.8 |
| B50 | 9298  | 51.9±4.7  | 16.1±1.1    | 53.1±2.5  | 10434±560  | 1292±56 | ND        | 6443±36   | 23.7±0.4 | 283.1±20     | 73.6±6.8   |
| B51 | 9034  | 44.7±1    | 777.7±14    | 89.6±0.3  | 26150±36   | 1553±11 | 12283±7   | 5094±53   | 5±0.5    | 338.7±4.1    | 122.9±8.9  |
| B52 | 17126 | 2.1±0.1   | 157.6±1     | 89.8±0.5  | 8977±445   | 930±19  | 3275±31   | 8182±114  | 8.2±0.4  | 1204.6±4.2   | 66.8±5     |
| B53 | 14269 | 75.2±1.3  | 265.3±5.6   | 176±2     | 31962±2743 | 3116±5  | 18452±255 | 13080±135 | 15.9±0.1 | 1144.3±74.2  | 151.3±5.3  |
| B54 | 14633 | 36.6±3.2  | 15±0.7      | 89.6±1.4  | 11936±174  | 1231±3  | ND        | 7824±52   | 3.5±0.3  | 893.9±17.5   | 38.2±3.4   |
| B55 | 2061  | 7.5±0.4   | 6.3±0.4     | 13.1±0.1  | 240±6      | 247±3   | ND        | 836±35    | 3.4±0.2  | 80.5±6.3     | 48.3±2.8   |
| B56 | 12714 | 50.9±4.4  | 299.7±6.3   | 66.9±1.4  | 23772±595  | 1600±23 | 15697±28  | 7864±22   | 3.7±0.3  | 698.2±44.4   | 219±21     |
| B57 | 12815 | 52±1.5    | 527.6±17.4  | 84.2±2.4  | 27556±859  | 2237±18 | 10348±129 | 8809±157  | 8.6±0.4  | 674.7±52.8   | 191.1±12   |
| B58 | 18887 | 110.7±1.4 | 648.4±8.2   | 173.9±0.3 | 38069±2036 | 3831±79 | 24142±150 | 18517±10  | 11.1±0.1 | 1054.9±46.2  | 187.3±13.9 |
| B59 | 9263  | 37.9±1.1  | 81.2±1.7    | 58.1±1.8  | 25516±748  | 1268±28 | 1004±28   | 6119±47   | 10.4±0   | 720.1±14     | 185.9±14.5 |
| B60 | 5784  | 20.3±0.5  | 87.1±1.1    | 27.7±0.7  | 17254±266  | 565±27  | 8153±52   | 2410±71   | 6.1±0.6  | 202.9±16.5   | 87.3±6     |
| B61 | 12716 | 57.3±1.4  | 1127.1±37.2 | 141.3±1.3 | 28100±1885 | 2965±55 | 16864±339 | 11576±119 | 132.2±12 | 1238.2±18.8  | 157.3±2.8  |
| B62 | 3756  | 22.1±0.7  | 74.6±1.9    | 39.2±0.1  | 11255±324  | 879±28  | 2492±5    | 2998±27   | 7.6±0.6  | 261.2±12.7   | 49.8±4.8   |
| B63 | 17627 | 44.9±1.1  | 207.3±2.2   | 125.6±3.6 | 37443±454  | 2380±80 | 529±8     | 10067±334 | 16.9±0.1 | 607.2±24     | 129.5±5.1  |
| B64 | 24505 | 185.2±5.9 | 240.9±6.2   | 352±33.1  | 66640±3231 | 8137±47 | 32078±345 | 28751±47  | 10±0.8   | 2994.1±165.5 | 184.1±17.3 |

|     |       |           |             |            |            |           |           |           |           |              |            |
|-----|-------|-----------|-------------|------------|------------|-----------|-----------|-----------|-----------|--------------|------------|
| B65 | 17312 | 69.3±1.7  | 1140.4±16.4 | 118.8±2.5  | 41991±67   | 3483±34   | 23006±609 | 18141±18  | 5.1±0.2   | 1031.8±56.1  | 120±5.8    |
| B66 | 7429  | 41.8±0    | 361.8±2.9   | 54.6±0.1   | 22253±777  | 1296±12   | 10439±114 | 5221±62   | 6.6±0.5   | 366±12.2     | 95.2±8.6   |
| B67 | 18694 | 58.5±0.3  | 1176.2±30.9 | 117.4±4.9  | 46713±1910 | 2700±8    | 30507±397 | 11012±23  | 28.2±2.4  | 623.2±19.6   | 73.1±7.1   |
| B68 | 14676 | 49.9±2.5  | 125.4±6.8   | 115.7±3.2  | 39685±2560 | 2432±15   | 1469±18   | 13444±13  | 12.1±0.6  | 1188.9±98.6  | 187.2±16.7 |
| B69 | 1669  | 4.5±0.4   | 772.5±22.7  | 11.7±0.2   | 2962±70    | 230±1     | 2043±29   | 776±25    | 1.6±0.1   | 96.9±3.4     | 28.1±1     |
| B70 | 4093  | 17.2±0.6  | 1426.7±17.6 | 62.4±0.3   | 13843±558  | 1528±22   | 8905±4    | 5180±140  | 107.8±9.2 | 698.9±42.7   | 189.7±13.5 |
| B71 | 14757 | 23.3±0.8  | 333.9±0.5   | 78.4±0.5   | 33362±2435 | 2364±24   | 20305±835 | 12350±587 | 18.7±1.7  | 902.8±24.5   | 156.7±15.6 |
| B72 | 6353  | 29.5±1.7  | 614.4±9.8   | 52±0.5     | 19546±177  | 1271±50   | 12880±254 | 5090±48   | 14.1±1.3  | 337.3±9.7    | 129.5±2.2  |
| B73 | 22362 | 99.4±0.3  | 2100±49.9   | 150.9±2.2  | 59953±963  | 4925±40   | 39923±188 | 19904±52  | 127.4±1.5 | 1640.2±146.6 | 203.1±13.9 |
| B74 | 8243  | 427.8±1.1 | 135.2±2.7   | 44.8±0.3   | 15361±308  | 2197±12   | 10578±8   | 8806±179  | 82.3±2.8  | 1045.2±96.8  | 248.6±17.1 |
| B75 | 15017 | 54.6±0.3  | 353.7±8.6   | 75.7±1.2   | 38745±3080 | 2210±15   | 22736±344 | 11417±98  | 20.8±0.1  | 744.1±9.5    | 166.2±7.3  |
| B76 | 15496 | 60.3±1.9  | 542.8±21.6  | 94.6±4.4   | 32798±18   | 1893±11   | 17424±93  | 6481±76   | 8.4±0.3   | 452±18.2     | 73.4±1.2   |
| B77 | 8054  | 30.6±2.5  | 116.4±7.6   | 39.4±1.5   | 21912±1261 | 943±16    | 10193±151 | 4398±55   | 4.7±0.3   | 267.5±7.9    | 51.7±4.8   |
| B78 | 22965 | 179.6±0.6 | 401.3±6.9   | 634.4±10.9 | 48297±143  | 13328±430 | 31563±652 | 39525±190 | 3.9±0     | 7513.9±612.2 | 215.7±2.4  |
| B79 | 7135  | 36.4±2.4  | 202.9±11.1  | 80.4±1     | 21166±729  | 1612±16   | 11624±354 | 6681±17   | 47.6±3.8  | 592±30.3     | 141±2.2    |
| B80 | 14767 | 29.9±0.9  | 211.5±6.7   | 60.7±0.5   | 23547±676  | 1893±24   | 1701±38   | 11268±179 | 49.1±2.8  | 899.1±32     | 310.3±27.1 |
| B81 | 11065 | 59.3±0.9  | 223.6±5.4   | 130.3±0.4  | 33774±1554 | 2968±41   | 2479±13   | 10695±36  | 19.8±1.3  | 569.1±21.6   | 232.4±2.9  |
| B82 | 23535 | 73.9±5.9  | 198±8.3     | 203.2±0.3  | 46755±969  | 5221±57   | ND        | 22127±119 | 139.4±3.8 | 2600.5±258.1 | 129.6±10.3 |
| B83 | 3368  | 14.3±0.9  | 18.3±0.5    | 17.5±0.2   | 9596±208   | 536±6     | 146±2     | 2593±6    | 15.2±1.5  | 324.2±24.3   | 150.1±8.5  |
| B84 | 9496  | 18±1      | 8.4±0.5     | 29.9±0.3   | 386±7      | 1861±26   | 2232±14   | 7652±137  | 1.4±0     | 595.8±3.3    | 23.7±1     |
| B85 | 17053 | 101.1±2.4 | 172.2±4.4   | 120.8±0.3  | 26280±450  | 3453±33   | 18561±64  | 16597±204 | 10.4±0.8  | 1344.3±123.6 | 223.9±9.9  |
| B86 | 12063 | 54.5±3.5  | 187.9±5     | 66.7±2.8   | 32911±2449 | 1256±16   | 8727±23   | 7449±43   | 14.3±0.8  | 409.8±29.6   | 112.3±5.8  |
| B87 | 12155 | 31.6±1.8  | 9.2±0.6     | 77.7±6.2   | 1859±11    | 1415±19   | ND        | 9780±148  | 30.4±1.1  | 506.6±8.6    | 37.5±0.2   |
| B88 | 10484 | 17.8±0.1  | 6.9±0.1     | 116.2±8.3  | ND         | 1519±2    | ND        | 8801±112  | 13.6±0.7  | 712.1±76.1   | 184.3±12.3 |
| B89 | 14615 | 62.6±6    | 291.6±8.8   | 99.2±2.1   | 38760±1856 | 3245±5    | 24851±181 | 15286±55  | 44.7±0.7  | 714.4±29.7   | 188.5±18.5 |
| B90 | 4867  | 1.7±0.1   | 193.7±0.9   | 47.9±0.7   | 6160±157   | 325±2     | 1875±59   | 3723±59   | 5.7±0.5   | 438±24.3     | 92.2±0.8   |
| B91 | 16474 | 2±0.1     | 10.9±0.6    | 113.5±7.1  | ND         | 1923±47   | ND        | 12822±118 | 15.9±0.4  | 1198.8±76.6  | 64.1±1.2   |
| B92 | 15752 | 9.2±0.3   | 363.7±4     | 31.8±0     | 31988±355  | 1805±16   | 3968±48   | 7620±76   | 27.7±0.6  | 480.2±12.4   | 118±4.3    |
| B93 | 21083 | 12.2±0.4  | 131.3±4.3   | 59.6±2.2   | 31282±1654 | 3826±163  | 11282±76  | 12868±19  | 4±0.1     | 2826.4±248.4 | 534.1±47.6 |
| B94 | 10182 | 40.5±0.1  | 338±5.2     | 93.9±3.9   | 27768±846  | 2753±74   | 6301±82   | 10195±156 | 93.4±5.1  | 1437.1±11.4  | 159.3±8    |
| B95 | 17678 | 65.9±0.7  | 556±15.5    | 108.9±5    | 41484±954  | 2218±16   | 24764±211 | 13607±15  | 37.1±0.4  | 1319.6±1.3   | 237.4±15.8 |
| B96 | 4365  | 10.7±0.4  | 32.4±0.2    | 21±1.4     | 10509±494  | 499±4     | 4810±37   | 1957±38   | 5.9±0.3   | 225.3±9.8    | 67.2±2     |
| B97 | 12579 | 8.7±0.3   | 80.5±0.1    | 54.3±0.1   | 28572±1195 | 1654±9    | 8947±31   | 914±2     | 6.9±0.6   | 4220.3±244.3 | 57.1±5.1   |

|      |       |           |            |            |            |           |           |           |            |              |            |
|------|-------|-----------|------------|------------|------------|-----------|-----------|-----------|------------|--------------|------------|
| B98  | 7633  | 2.1±0.2   | 33.1±1.5   | 16.8±0.1   | 23013±1004 | 579±5     | 5643±125  | 2395±9    | 2.4±0.1    | 3056.9±213.4 | 33.4±0.9   |
| B99  | 11398 | 2.1±0     | 29.8±0.1   | 3.8±0.2    | 45695±1027 | 2573±51   | ND        | 1884±10   | 5±0.3      | 3429.4±194.8 | 64.5±3.6   |
| B100 | 13828 | 13.5±0.4  | 48.1±1.1   | 38.1±0.9   | 34879±1601 | 1629±25   | 8008±284  | 5715±39   | 10±0       | 2285.1±74.9  | 86±6.6     |
| B101 | 20483 | 119.2±0.4 | 295.8±6.8  | 200.6±6.5  | 50853±912  | 4042±60   | 28889±407 | 21550±138 | 134.9±1.5  | 1121.4±16.3  | 128.1±2.8  |
| B102 | 6073  | 21.2±0    | 34.7±0.7   | 40.5±1.9   | 15845±439  | 871±20    | 5637±52   | 2195±9    | 6±0.4      | 957.7±78.4   | 94.2±4.4   |
| B103 | 6341  | 1.9±0     | 151.4±1.6  | 61.8±1.3   | 19116±450  | 1346±53   | 8860±102  | 4952±84   | 16.7±0.5   | 305.3±0.6    | 83.6±3.6   |
| B104 | 10743 | 1.9±0.2   | 108.2±1.5  | 77.2±2.1   | 37418±676  | 2146±11   | 9941±203  | 10223±308 | 17±1.2     | 939±19.2     | 177.9±8.1  |
| B105 | 23788 | 81.9±1.5  | 210.2±4.5  | 115.9±1.6  | 55129±1302 | 3692±67   | 31424±115 | 16440±281 | 18.1±0.4   | 806.8±11.9   | 122.9±2.9  |
| B106 | 9635  | 52.5±3.2  | 67.5±0.2   | 80.8±1.7   | 25997±108  | 1305±2    | 15291±284 | 7371±184  | 14.6±0.8   | 601.8±30.6   | 91.2±6.5   |
| B107 | 10377 | 33.3±0.9  | 231.5±4.2  | 127.1±0.2  | 33345±2973 | 2817±33   | 15524±113 | 12707±133 | 24±0.9     | 1317±109.7   | 160.8±0.7  |
| B108 | 22286 | 111.4±1.1 | 196.6±3.3  | 176.2±16   | 59227±507  | 4168±26   | 33721±816 | 18127±352 | 31.6±0.7   | 1825.4±90.3  | 197.3±2.5  |
| B109 | 14836 | 48.6±1.5  | 174.8±1.4  | 114.9±3    | 32855±1755 | 2265±17   | 18526±178 | 7579±146  | 13.3±0     | 475.9±34     | 140±9.2    |
| B110 | 9223  | 34.2±3.3  | 96.5±2.7   | 84±2       | 25452±312  | 1390±22   | 12286±310 | 8387±59   | 151.3±9.2  | 789.3±40.9   | 164.6±14.3 |
| B111 | 6339  | 26±0.4    | 53.1±0.2   | 53.3±0.2   | 17587±324  | 897±4     | 9614±197  | 4489±20   | 102.3±9.3  | 428.4±34.7   | 78.2±7.5   |
| B112 | 7199  | 25.9±2.2  | 60.3±3.2   | 28.8±0.2   | 18969±572  | 671±9     | 9679±58   | 3453±125  | 21.2±2.1   | 196.7±15.7   | 63.9±1.4   |
| B113 | 5571  | 17.5±0.4  | 564.2±9.8  | 27.9±0     | 11746±1220 | 632±14    | 6343±80   | 3431±67   | 69.3±3.5   | 391.9±1.2    | 80±5.8     |
| B114 | 29124 | 214.3±8.8 | 520.4±5.8  | 624±17.5   | 75289±4851 | 13841±347 | 43764±107 | 50229±277 | 198.4±4.4  | 5022.5±92.8  | 280.8±26.3 |
| B115 | 3542  | 1±0       | 30.6±2.3   | 29.1±0.2   | 3569±29    | 875±0     | 2756±131  | 3421±147  | 6.7±0.1    | 353.2±19     | 25.5±1     |
| B116 | 4290  | 0.8±0     | 21.4±1.9   | 7.9±0.1    | 13796±1437 | 521±26    | 6383±18   | 109±2     | 2.2±0.2    | 1140.6±26.4  | 21.3±0.9   |
| B117 | 19477 | 30.1±0.3  | 258.8±11.5 | 80.9±3.3   | 46586±478  | 3120±46   | 25577±551 | 14625±76  | 54.4±5.1   | 1659.4±41.4  | 132.4±1.2  |
| B118 | 17077 | 61.4±6    | 127.7±5.4  | 121.5±1.7  | 43713±2241 | 3566±114  | 20421±59  | 16103±8   | 41.4±3.5   | 877.9±37     | 146.3±7.6  |
| B119 | 14778 | 91.6±9.2  | 234.4±4.3  | 373.9±12.7 | 29235±1466 | 9042±329  | 18071±62  | 20864±106 | 54.7±1.6   | 3283.4±151.3 | 117.2±4.2  |
| B120 | 11234 | 50.3±0.6  | 117.5±0.2  | 90.7±0     | 30058±991  | 1692±12   | 16443±150 | 7126±113  | 117.4±10.4 | 670.4±25.2   | 122.1±4.7  |
| B121 | 15504 | 83.5±4.6  | 274.8±5.7  | 140.4±6.8  | 59827±833  | 3076±80   | 26462±119 | 12509±64  | 28.9±2.4   | 875.8±5.1    | 222.5±5.2  |
| B122 | 28686 | 119.7±11  | 290.1±3.1  | 127.8±5.8  | 72342±2314 | 3915±83   | 39132±445 | 19468±864 | 153.6±15.1 | 1209.3±16.1  | 114.7±7.4  |
| B123 | 26275 | 61±2.2    | 255.2±6.2  | 133±4.4    | 52218±257  | 2654±10   | 33678±548 | 15658±10  | 87.5±6.1   | 843.8±8.4    | 201.4±18   |
| B124 | 3417  | 1.3±0.3   | 25.7±1.4   | 28.9±0.5   | 6724±311   | 1243±58   | 16±0      | ND        | 2.6±0.2    | 2105.7±171.3 | 14.2±0.8   |
| B125 | 12196 | 115.2±0.2 | 137.3±10.2 | 222.6±4.8  | 33693±1261 | 4336±88   | 17648±287 | 18290±204 | 391.5±10   | 2598.1±23.7  | 272±25.4   |
| B126 | 16025 | 60.2±0.5  | 214.6±10.8 | 239.4±0.6  | 38356±2449 | 4374±69   | 19197±67  | 15064±454 | 66±4.2     | 1467.4±18.1  | 211.3±19.2 |
| B127 | 19432 | 95.7±4.6  | 698.2±6.4  | 190.6±10.6 | 52462±3202 | 3754±49   | 29413±476 | 15710±24  | 239.3±21   | 1656.8±97.6  | 200.4±6.8  |
| B128 | 10268 | 43±0.3    | 49.3±0.6   | 60.5±2.6   | 25367±263  | 1634±4    | 12939±378 | 6713±66   | 14.4±1     | 915.3±33.3   | 142.7±13.3 |
| B129 | 25654 | 120.4±3.8 | 276±6.1    | 216.7±3    | 54922±1239 | 4600±1    | 32628±479 | 19821±348 | 64.5±0.8   | 1225.3±115.8 | 201.4±9.8  |
| B130 | 6307  | 13.8±1.1  | 94.5±1.7   | 20.2±0.1   | 22097±327  | 800±17    | 8522±90   | 3295±42   | 21.4±0.5   | 284.4±10.3   | 119.5±11.6 |

|      |       |           |            |           |            |          |           |           |           |              |            |
|------|-------|-----------|------------|-----------|------------|----------|-----------|-----------|-----------|--------------|------------|
| B131 | 22310 | 200±11.5  | 222.5±11.8 | 327.2±0.4 | 65481±1596 | 8476±428 | 41860±442 | 37304±183 | 137.7±3.9 | 3955.8±325.1 | 169.2±1    |
| B132 | 6554  | 27.8±1.4  | 63.7±4.4   | 68.6±0.3  | 18195±152  | 1154±17  | 7348±159  | 6711±106  | 30.7±1.3  | 355.9±2.7    | 81.7±1.6   |
| B133 | 16059 | 53.1±3.3  | 90±0.7     | 57.8±0.5  | 41178±525  | 1519±9   | 17008±58  | 4496±0    | 8.9±0.1   | 971.2±82.5   | 69.9±0.5   |
| B134 | 4182  | 4.2±0.2   | 46.3±1.9   | 18.2±0.2  | 9594±444   | 184±9    | 1155±53   | 956±7     | 3.2±0     | 506.2±28.6   | 16.9±1.8   |
| B135 | 20318 | 100.3±1.2 | 209.4±5    | 128±2.1   | 53375±108  | 2916±52  | 31997±445 | 14849±246 | 199±11.8  | 939±15.7     | 164.3±10.6 |
| B136 | 27269 | 46.2±4.1  | 47.5±4.2   | 78.2±2.2  | 26907±671  | 2062±57  | 16591±502 | 8498±18   | 5.9±0.1   | 936±51       | 196.8±20.1 |
| B137 | 10606 | 18.4±1.6  | 26.2±1.6   | 32.4±1.9  | 17739±78   | 499±2    | 8058±40   | 2602±107  | 2.4±0.2   | 581.5±13.6   | 34.7±3.5   |
| B138 | 10696 | 15.3±1    | 174±1.1    | 35.6±0.3  | 11770±1073 | 878±34   | 5240±138  | 2933±40   | 4.5±0.4   | 248.1±16.8   | 81.1±9.3   |
| B139 | 6853  | 49.4±0.4  | 125.7±4.2  | 90.3±0.2  | 31295±150  | 1427±33  | 15030±313 | 6769±41   | 33.2±0.3  | 632.8±29.1   | 135.9±9.3  |
| B140 | 10940 | 18.5±1.5  | 485.3±17   | 46.6±0.1  | 27884±925  | 1529±50  | 11759±293 | 5502±2    | 41.3±4.1  | 221.6±1.5    | 96.6±6.8   |
| B141 | 11932 | 4.7±0     | 148±6.5    | 88.8±2.6  | 19622±278  | 2301±6   | 10054±58  | 8216±146  | 59.8±4.2  | 349.8±2.2    | 98.8±5.5   |
| B142 | 3631  | 17.5±0.3  | 68.2±3.3   | 79.1±3.3  | 24637±667  | 1172±24  | 11594±45  | 3083±87   | 1.8±0.1   | 2520.3±192   | 69.7±7.5   |
| B143 | 9442  | 40.5±0.5  | 124±2.5    | 59.5±3.4  | 29250±465  | 1748±52  | 14294±119 | 8130±231  | 76.1±4.6  | 908.6±94.7   | 272±19.5   |
| B144 | 8711  | 93.2±5.6  | 227.4±0.4  | 128.3±1.9 | 70868±240  | 4736±76  | 44535±452 | 18543±575 | 56.4±4.5  | 699.4±3.2    | 208.3±1.8  |
| B145 | 4173  | 11.6±0.1  | 52±0.3     | 22.1±0.6  | 8576±626   | 463±12   | 4082±68   | 1887±35   | 26.1±2.3  | 139.2±10.4   | 76.1±0.9   |
| B146 | 6436  | 5.2±0.2   | 171.6±4.8  | 46.2±0.2  | 14929±11   | 971±13   | 6841±155  | 4552±38   | 8.1±0.6   | 482.3±16.5   | 50.6±3.6   |
| B147 | 9134  | 19.3±1.2  | 76.6±2.5   | 31.3±0.9  | 17123±1    | 514±5    | 7090±114  | 3344±44   | 24.9±2.5  | 201.7±6.1    | 43.3±3     |
| B148 | 6338  | 38.3±2.2  | 127.9±0.3  | 48±0.1    | 17057±1334 | 1030±18  | 9530±54   | 3883±115  | 51.2±3.5  | 274.1±14.6   | 139.5±13.6 |
| B149 | 7869  | 28.3±2.8  | 123.4±1.9  | 40±1.4    | 16297±662  | 923±4    | 8997±214  | 3635±32   | 34±1.5    | 262.7±17.2   | 65.3±4.8   |
| B150 | 12667 | 58.5±2.4  | 150.7±3.2  | 222.1±3.9 | 38601±1094 | 4255±93  | 18126±628 | 14061±176 | 33.9±3.1  | 1665±9.1     | 111.9±4.6  |
| B151 | 8485  | 21±1.8    | 56.4±1.4   | 41.3±2.2  | 17985±1020 | 1028±29  | 8764±196  | 4074±107  | 35±2.7    | 326.1±27.5   | 46.7±3.1   |
| B152 | 6929  | 19.9±0.1  | 64.1±0.7   | 28.4±0.5  | 18273±335  | 585±8    | 9200±74   | 3125±19   | 4.3±0.2   | 284.6±18.8   | 47.8±1.6   |
| B153 | 9122  | 41.1±1.2  | 110.4±4.5  | 72.7±1.5  | 21568±127  | 1414±19  | 12616±173 | 6727±129  | 121.2±7.5 | 648.3±55.6   | 134.4±4.4  |
| B154 | 4799  | 0.1±0.2   | 18.1±1     | 13.8±0.7  | 11156±707  | 480±10   | 3716±64   | 891±9     | 5.2±0.5   | 507.4±28.5   | 17.9±0.5   |
| B155 | 3390  | 16.3±0.6  | 33.3±1.7   | 31±0.4    | 6950±143   | 668±15   | 3511±42   | 2454±95   | 20.7±0.3  | 293.2±7.5    | 66.4±5.8   |
| B156 | 1357  | 10.6±0.8  | 44.9±3.5   | 20.5±0.7  | 5087±533   | 341±1    | 2709±63   | 1808±19   | 13.8±1.3  | 124.8±8.5    | 27.1±2.8   |
| B157 | 3885  | 2.7±0     | 18±1.7     | 27.2±0.4  | 6960±509   | 660±10   | 2916±88   | 1781±57   | 3.3±0.3   | 360.1±6.7    | 30.7±3.4   |
| B158 | 8063  | 2.7±0     | 155.1±1.5  | 24.6±1    | 16605±750  | 984±17   | 9171±86   | 3453±8    | 5.6±0.4   | 316.5±2.5    | 108.4±10.5 |
| B159 | 6590  | 0.5±0.2   | 30.9±1.2   | 17.3±0.6  | 11859±343  | 638±24   | 1713±15   | 1970±21   | 2.3±0.2   | 247.2±24.9   | 48.1±1.2   |
| B160 | 3844  | 3.4±0.1   | 18.3±0.6   | 17.9±0.3  | 10758±260  | 515±2    | 5267±267  | 1707±18   | 2.9±0.3   | 400.2±22.3   | 31.4±3.4   |
| B161 | 4707  | 28.7±0.7  | 82.6±6.1   | 78.2±0.4  | 14970±311  | 1724±1   | 7043±54   | 6431±54   | 7.5±0.2   | 701.4±20.8   | 96.7±7.5   |
| B162 | 13898 | 32.9±0    | 137.5±2.1  | 51.3±2.4  | 23749±1888 | 955±13   | 12041±44  | 4786±82   | 9.7±0.6   | 364.9±6.3    | 75.9±7.7   |
| B163 | 18232 | 56.2±0.4  | 223.1±4.6  | 101.8±1   | 49989±1527 | 1532±5   | 26008±510 | 11846±298 | 120.9±0.2 | 1022±4       | 171.9±11.5 |



|      |       |           |            |            |            |          |           |           |           |              |            |
|------|-------|-----------|------------|------------|------------|----------|-----------|-----------|-----------|--------------|------------|
| B164 | 10779 | 50.7±1.9  | 146.7±2    | 68.8±1.7   | 33823±2177 | 1933±28  | 17378±133 | 8446±84   | 121.4±3.1 | 752.2±37.3   | 93±8.8     |
| B165 | 7633  | 68.7±5.3  | 93.4±3.2   | 111.8±4.2  | 28764±884  | 2125±54  | 14307±209 | 8226±58   | 69.6±8.2  | 639.8±27.8   | 197.2±12   |
| B166 | 19409 | 106.7±4.9 | 199.2±15.6 | 113.8±0.3  | 64798±604  | 3282±28  | 37291±303 | 14933±92  | 20.3±1.5  | 1154.8±74.5  | 77.7±8.7   |
| B167 | 4808  | 9±0.2     | 41.5±2     | 54.4±0.3   | 15397±1269 | 459±7    | 6217±75   | 3730±36   | 5.3±0     | 577±17.6     | 28.5±3.6   |
| B168 | 3148  | 14.7±0.4  | 23.3±1.3   | 19.1±0.1   | 8938±211   | 290±2    | 4741±23   | 1487±9    | 11.1±0.6  | 104.4±9.2    | 34.2±4.1   |
| B169 | 10131 | 43.1±0.8  | 71.8±1     | 68.9±0.3   | 23666±674  | 1424±20  | 10845±5   | 6026±96   | 31.1±1.8  | 412.8±33.6   | 114.3±9.9  |
| B170 | 7598  | 26.8±1.7  | 49±1.2     | 26.7±0.2   | 22031±880  | 951±4    | 11351±414 | 3169±51   | 14.4±1    | 138.7±11     | 74.7±8.5   |
| B171 | 14917 | 60.5±4.6  | 195.5±4.7  | 116.4±1.8  | 38353±209  | 2022±92  | 21965±132 | 12988±287 | 47.3±4.4  | 753.9±16.1   | 156.2±4.2  |
| B172 | 22203 | 101.5±1   | 592±19.8   | 237.7±9.6  | 50672±1521 | 5046±77  | 29024±837 | 20592±757 | 54.2±5    | 1380.3±56.2  | 223.4±11.8 |
| B173 | 4672  | 13.2±0.4  | 101.1±6.6  | 22.5±0.3   | 13424±475  | 619±1    | 6074±86   | 2698±38   | 41.9±2.4  | 262.3±24.8   | 87.6±6.8   |
| B174 | 3569  | 12.9±0.3  | 31.9±3     | 20.4±0.4   | 8418±343   | 537±16   | 1740±48   | 2058±22   | 4.7±0.4   | 271±6.3      | 36.3±1.7   |
| B175 | 5327  | 4.2±0.1   | 25.7±1     | 14.2±0.1   | 14280±321  | 395±1    | 5182±2    | 2049±30   | 5.1±0.5   | 301.5±22.9   | 43±3.2     |
| B176 | 13112 | 5.5±0.3   | 295.2±7.7  | 75.7±4.7   | 29308±1251 | 1504±11  | 11889±47  | 7367±185  | 3±0.2     | 783.1±62.9   | 113.5±8.3  |
| B177 | 4122  | 20.9±0.7  | 73.8±0.2   | 50.2±0.4   | 11873±562  | 843±31   | 5774±148  | 3115±81   | 8±0.5     | 233.3±2.1    | 82.2±6.9   |
| B178 | 3225  | 26.2±0.4  | 51.9±1.1   | 85.6±1.7   | 10657±916  | 1632±1   | 5303±12   | 6503±228  | 10.5±0.3  | 652±46.9     | 50.9±5.8   |
| B179 | 12403 | 45.3±2.7  | 62±2       | 50.7±1     | 31548±530  | 1536±1   | 13386±440 | 7245±109  | 23.3±0.8  | 340.1±32.5   | 60.9±4.8   |
| B180 | 16243 | 17.3±1.3  | 76.4±4.2   | 84.2±1.9   | 44315±1324 | 2850±83  | 24552±158 | 12489±118 | 29.7±2.7  | 1181.4±106.5 | 35.3±2.4   |
| B181 | 11600 | 3.4±0     | 482.4±26.7 | 118.6±2.8  | 35979±1532 | 2569±69  | 7189±184  | 10438±252 | 13.4±0.9  | 1059.1±94.2  | 92±4.8     |
| B182 | 9263  | 74.7±3.8  | 187.1±6.6  | 196.4±0.1  | 24882±923  | 3283±46  | 13825±224 | 9931±258  | 10.7±0.3  | 1110.3±54.5  | 124.4±5.7  |
| B183 | 15867 | 50.3±1.9  | 29±2.2     | 120.4±2.3  | 44300±1913 | 2101±72  | 28±9      | 9872±159  | 37.5±3.1  | 441.1±23.7   | 32.6±0.1   |
| B184 | 10334 | 52.6±4    | 116.6±2.8  | 101.4±2.6  | 27292±312  | 2146±13  | 16095±43  | 10618±121 | 109.7±9.8 | 1130.7±46.2  | 94.3±1.5   |
| B185 | 3737  | 22.2±0.1  | 119.1±5.4  | 37.8±1.4   | 11420±1312 | 611±3    | 4375±203  | 2405±23   | 14.8±0.8  | 172.5±10.4   | 51.8±5     |
| B186 | 5444  | 21.8±1.3  | 43.6±1     | 47.5±3.9   | 15946±171  | 1084±12  | 9103±116  | 5732±134  | 81.5±8    | 592.2±16.8   | 69±3       |
| B187 | 12342 | 16.4±0.6  | 61.1±4.9   | 82.7±2.1   | 1489±87    | 2029±20  | 10280±35  | 4126±8    | 9±0.8     | 2613.5±9.9   | 301.9±4.8  |
| B188 | 3356  | 0.2±0.2   | 16.2±1.2   | 14.5±0.8   | 5684±547   | 380±10   | ND        | ND        | 2.3±0.2   | 996.9±91.9   | 23.5±0.9   |
| B189 | 5504  | 0.8±0.3   | 31±0.3     | 21.3±0.3   | 17615±1543 | 571±15   | 8422±3    | 1769±36   | 3±0.3     | 797.3±53.2   | 17.4±0.1   |
| B190 | 8250  | 6.5±0.1   | 49.4±3.3   | 37.4±1.2   | 23083±871  | 1395±31  | 4716±38   | 1144±53   | 6.7±0.5   | 1534.9±111.1 | 28.5±2.3   |
| B191 | 17120 | 55.7±1.3  | 160.2±0.4  | 128.5±3.6  | 46601±717  | 2153±41  | 20257±44  | 14865±401 | 36.5±5.3  | 1140.4±52.5  | 102.4±6.1  |
| B192 | 12066 | 87.3±2.1  | 210±5.9    | 95±2.3     | 38622±3331 | 2637±111 | 19503±31  | 9772±219  | 65±3.8    | 543.6±25.1   | 130.3±7.4  |
| B193 | 20124 | 63.1±6.3  | 370.4±8.9  | 232.9±0.9  | 64906±5523 | 3794±63  | 35447±583 | 20587±221 | 69.5±0.4  | 1840.6±161.4 | 317±2.9    |
| B194 | 3203  | 0.3±0     | 32.4±0.9   | 23.3±0.1   | 7267±62    | 504±15   | 381±27    | 2174±63   | 7±0.2     | 151.1±5.3    | 31.6±1.8   |
| B195 | 18371 | 95.9±8    | 285.9±6.9  | 146.1±5.8  | 46486±823  | 2783±68  | 26629±667 | 13624±465 | 100.3±4   | 890±37.8     | 164.9±0.4  |
| B196 | 22043 | 120.4±3.6 | 301.6±27.6 | 169.4±11.5 | 54611±551  | 4538±72  | 33069±180 | 21411±384 | 129±4.1   | 1782.3±42.1  | 257.6±15.7 |

|      |       |           |            |            |            |          |           |           |            |              |            |
|------|-------|-----------|------------|------------|------------|----------|-----------|-----------|------------|--------------|------------|
| B197 | 7851  | 4.6±0.1   | 28.5±0.7   | 18.9±0.1   | 16434±325  | 161±5    | 5125±47   | 238±25    | 8.4±0.1    | 873.9±52.9   | 22.2±2.4   |
| B198 | 8106  | 3.2±0.1   | 60.2±0.1   | 26.3±0.3   | 17807±1355 | 898±27   | 2584±85   | 2875±3    | 14.1±0.3   | 265.4±19.5   | 24.5±1.7   |
| B199 | 3648  | 20.2±1    | 51.2±3.2   | 30.2±0.2   | 13973±244  | 533±14   | 6033±82   | 2236±83   | 17.2±1.6   | 147.4±6.9    | 66.9±2.9   |
| B200 | 8260  | 37.3±0.4  | 57.7±2.6   | 41.4±0.4   | 24040±169  | 782±19   | 10884±22  | 4099±5    | 8.9±0.4    | 267.1±17     | 55.4±2.9   |
| B201 | 12783 | 59.6±2.7  | 122.5±0    | 85.2±0.5   | 32760±1014 | 2528±18  | 17833±169 | 12705±199 | 73.3±4.3   | 498.4±36.4   | 69.1±1.4   |
| B202 | 8304  | 40.5±2.3  | 252.1±8.2  | 68.9±1.7   | 26016±130  | 1657±10  | 12662±334 | 7499±104  | 26.7±1.1   | 419.5±44.5   | 63.6±1.9   |
| B203 | 4118  | 58.5±43.3 | 29.4±2.7   | 38.9±1.9   | 12442±143  | 707±0    | 6663±22   | 2999±49   | 15±1.5     | 350.6±33     | 73.5±5.1   |
| B204 | 4541  | 19.6±0.1  | 40.8±0.1   | 34.2±1.3   | 12456±573  | 686±2    | 7137±69   | 2868±57   | 27±2.1     | 211.2±10.3   | 41.3±2.5   |
| B205 | 11705 | 69.3±1.8  | 256±7      | 128±3      | 37508±1869 | 2971±6   | 21813±819 | 12243±72  | 59.4±3.7   | 853.4±23.3   | 187.3±0.8  |
| B206 | 4206  | 22±0.2    | 150.4±3.2  | 95.4±0.4   | 15531±30   | 1409±15  | 9470±119  | 6005±102  | 88.3±3.4   | 770.1±29     | 168.2±0.7  |
| B207 | 10904 | 52.9±2.4  | 114.1±7.7  | 103.5±2.9  | 26741±123  | 2264±0   | 16440±240 | 11264±273 | 123.7±10.5 | 775.6±33.4   | 146.6±12.3 |
| B208 | 10350 | 61±0.4    | 416.8±2.2  | 97±1.5     | 33502±384  | 2592±100 | 19291±330 | 9944±28   | 18.4±0.9   | 761±46.8     | 87.6±3.9   |
| B209 | 4788  | 27.1±0.4  | 72.4±0.8   | 37±0.4     | 17157±229  | 832±33   | 8195±7    | 2865±44   | 7.5±0.3    | 171±10.4     | 40.9±1.8   |
| B210 | 17094 | 57±1.6    | 132.3±3.7  | 104.9±3.2  | 36378±1323 | 2315±76  | 21004±174 | 13155±46  | 167.4±6.5  | 1191.8±87    | 163.2±9.9  |
| B211 | 12772 | 58.7±1.3  | 93.2±2.1   | 72.6±0.2   | 33240±653  | 2106±28  | 18407±626 | 7453±10   | 35.7±0.7   | 426.7±9.3    | 191.5±17.4 |
| B212 | 10257 | 56±3.9    | 168.3±4    | 169.9±12.4 | 30639±49   | 3940±33  | 16025±43  | 14233±311 | 239.8±6.8  | 2008.9±202.3 | 185.1±10.7 |
| B213 | 7289  | 27±0      | 117.4±0.4  | 57.4±0.2   | 23314±20   | 1341±8   | 11075±155 | 5439±112  | 62.9±5.3   | 485.4±21.3   | 111.7±4.2  |
| B214 | 12821 | 58.7±2.4  | 696.7±15.1 | 101.7±0.2  | 41133±657  | 2984±81  | 21368±22  | 10490±287 | 31.4±0.3   | 462.2±11.7   | 122.2±13.2 |
| B215 | 16779 | 64±3      | 108.6±3.1  | 133.8±0.1  | 32472±1054 | 2214±22  | 19086±397 | 13275±177 | 147.7±2.8  | 1038.2±22.9  | 231.7±1.6  |
| B216 | 14404 | 32.4±1.6  | 155.5±8.1  | 180.7±7.2  | 36241±491  | 3056±24  | 15860±11  | 13173±239 | 9.1±0      | 931.5±45.3   | 164.9±5.7  |
| B217 | 16753 | 74.8±3.1  | 151.7±5.2  | 95.9±0.6   | 50157±20   | 2206±33  | 25663±464 | 11696±254 | 63.3±2.6   | 512±38.7     | 83.3±8.4   |
| B218 | 18173 | 94.2±6.4  | 164.9±12.7 | 88.6±2.1   | 46983±446  | 2834±24  | 26045±457 | 11079±57  | 40.1±0.3   | 501.8±11.8   | 131.8±10.5 |
| B219 | 8034  | 22±0.4    | 60.6±2.6   | 34.3±1.7   | 21524±783  | 877±3    | 10725±236 | 4050±60   | 17.5±0.5   | 332.6±0.4    | 110.9±3    |
| N1   | 9882  | 55.7±2.9  | 109.1±3    | 74.3±0.4   | 30689±1604 | 2177±42  | 18107±290 | 8620±62   | 25.8±2.5   | 544.4±2.8    | 45.9±0.3   |
| N2   | 2050  | 17.8±0    | 38.9±1.7   | 39.4±0.4   | 6627±172   | 792±15   | 3191±36   | 2783±25   | 12.1±0.2   | 280.3±1.1    | 30.3±1.5   |
| N3   | 1870  | 28.7±0.3  | 35.4±0.5   | 39.6±2.5   | 13728±150  | 1159±1   | 4804±91   | 4289±97   | 33.1±0.1   | 386±2.9      | 46.5±1.9   |
| N4   | 7609  | 26.7±1.6  | 322.9±2.2  | 48.4±0.9   | 17669±1013 | 871±7    | 8499±179  | 6048±33   | 45.6±0.9   | 268.1±11     | 75±3.9     |
| N5   | 9054  | 44.8±2.6  | 89.3±1.3   | 62.7±1.2   | 28385±1460 | 1087±29  | 10204±163 | 8036±118  | 276.4±21.4 | 502.4±18.2   | 77.6±3.3   |
| N6   | 8792  | 36.7±2.6  | 637.8±2    | 80.2±1.4   | 22837±817  | 1583±59  | 11648±111 | 7018±62   | 81.1±1.8   | 658.6±19.9   | 162.6±9.4  |
| N7   | 17922 | 100±4     | 170.4±0.4  | 195±7.1    | 56332±3469 | 4832±27  | 33327±160 | 18676±177 | 50.8±3.7   | 1285.5±41.6  | 192.8±3.9  |
| N8   | 11599 | 59.3±5.7  | 115.5±0.2  | 82.9±4.8   | 35567±1280 | 2332±17  | 17502±261 | 8816±311  | 93.8±1.3   | 1055.7±46.6  | 105.3±0.3  |
| N9   | 3753  | 11.3±0.2  | 37±0.5     | 15.2±0.2   | 9604±311   | 480±1    | 5484±33   | 1594±8    | 6.1±0.3    | 110.8±1.5    | 45.9±2.9   |
| N10  | 4750  | 24.7±1    | 60.7±2.7   | 30.4±0.1   | 15364±249  | 773±3    | 7558±37   | 2841±1    | 12.6±0.6   | 182.2±7.1    | 54.7±3.5   |

|     |       |          |             |           |            |         |           |           |           |             |            |
|-----|-------|----------|-------------|-----------|------------|---------|-----------|-----------|-----------|-------------|------------|
| N11 | 18022 | 56.2±2.6 | 131.8±3.8   | 99.4±2.1  | 38807±1974 | 2606±9  | 20597±248 | 12076±57  | 183.9±5.8 | 1305.3±12.7 | 146.3±10.4 |
| N12 | 8557  | 25.9±0.5 | 76.9±0.8    | 53±0.1    | 17230±1528 | 932±3   | 5289±26   | 5422±77   | 196.8±2.8 | 672.3±6.6   | 138.2±5.2  |
| N13 | 12357 | 61±1.3   | 214.8±3     | 150.4±4.5 | 27977±1007 | 2693±15 | 14471±230 | 11912±222 | 75.8±5.8  | 934.8±92.6  | 73.3±6.1   |
| N14 | 14499 | 52.9±2.7 | 164.6±4.1   | 102.5±9.4 | 33711±1015 | 2350±0  | 22299±190 | 10912±292 | 107.6±0.6 | 597.5±37.2  | 117.4±1    |
| N15 | 12335 | 50.8±2.3 | 242.5±0.2   | 73.2±1.1  | 30715±523  | 2052±42 | 14903±15  | 8596±58   | 84.9±3.5  | 628.9±23.1  | 124.3±7.1  |
| N16 | 6580  | 25±1.1   | 94.7±0.8    | 41.2±0.2  | 16696±1037 | 371±1   | 8097±108  | 3897±85   | 26±0.7    | 234.2±4.4   | 84.9±2.7   |
| N17 | 11105 | 34.7±0.1 | 57.9±4.1    | 32.8±0.5  | 29221±229  | 682±7   | 15811±61  | 5521±22   | 17.1±0.9  | 341.5±27.3  | 54.8±3.9   |
| N18 | 13168 | 62.5±0.5 | 546.5±7     | 112.5±5   | 36868±186  | 1565±16 | 17788±271 | 9358±79   | 57.4±3.9  | 678.4±8.6   | 140.6±9.4  |
| N19 | 7128  | 31.7±2.3 | 157.5±7.1   | 55.1±1.6  | 17934±57   | 1150±12 | 9527±163  | 3845±25   | 23.7±0    | 250.7±6.1   | 114.7±9.4  |
| N20 | 8619  | 39.4±1.7 | 65.7±0.1    | 76.9±1.2  | 21957±1829 | 1802±40 | 10919±12  | 6149±168  | 20±1.6    | 279±25.4    | 50.9±0.9   |
| N21 | 19586 | 74.3±3.4 | 610.4±9.4   | 193.4±9.9 | 55270±696  | 4998±66 | 28432±220 | 18002±97  | 31.2±2    | 1250.8±37.2 | 167±12.3   |
| N22 | 4744  | 20.5±0.7 | 113.7±11.6  | 34.5±0.2  | 11915±215  | 404±0   | 7013±7    | 1818±68   | 5±0.5     | 126.1±4.8   | 27±2       |
| N23 | 6469  | 23.3±0.1 | 52.3±0.6    | 46.9±1.3  | 15550±270  | 860±10  | 10295±11  | 3465±31   | 9.9±0.7   | 213.9±4.6   | 96.7±2     |
| N24 | 3328  | 12.4±0.2 | 58.1±0.9    | 19.5±1.1  | 8769±589   | 312±8   | 3601±44   | 1351±13   | 9.9±1.1   | 130.4±5.2   | 27.6±2.6   |
| N25 | 10140 | 43.6±0.7 | 68.2±5.1    | 61.6±3.6  | 26251±2068 | 1658±7  | 13994±305 | 9310±99   | 57.7±2    | 544.7±16.8  | 82.3±5.5   |
| N26 | 6176  | 29±1.9   | 336.1±4.7   | 52±0.6    | 18117±303  | 1334±13 | 10303±204 | 4019±22   | 20.8±1.8  | 250.9±28.5  | 42.8±3.4   |
| N27 | 5170  | 18.1±1.1 | 96.6±5.6    | 40.8±0.1  | 13203±690  | 906±8   | 5856±84   | 3588±19   | 18.2±1.1  | 377.2±51.3  | 84±0.8     |
| N28 | 8262  | 0.7±0    | 3654.6±47.8 | 10.6±0.5  | 2781±47    | 467±5   | 8449±66   | 3900±21   | 4±0.1     | 510.7±35.6  | 47.6±2.2   |
| N29 | 9944  | 10.1±0.7 | 34±1.4      | 49.7±2.7  | 21059±225  | 1953±4  | ND        | 8250±93   | 26.4±1.8  | 485.4±17.7  | 27.2±1.9   |
| N30 | 12095 | 76.5±0.3 | 338.6±2     | 184.9±2.3 | 26330±618  | 3943±9  | 18027±40  | 18669±231 | 112.8±3.7 | 1378.1±66.3 | 113.6±3.2  |
| N31 | 5609  | 17.9±0.8 | 158.4±5.3   | 28.7±0.4  | 16647±45   | 761±0   | 8162±199  | 3329±10   | 60.9±4.8  | 389.7±28.2  | 82.6±2.1   |
| N32 | 8548  | 48.8±4   | 454.6±26.6  | 103.8±3.2 | 23565±419  | 2171±25 | 11523±105 | 9282±58   | 130.2±5.1 | 955.3±0.7   | 115.7±3.4  |
| N33 | 6515  | 29.9±0.4 | 308.8±4.3   | 72.9±0.8  | 16885±535  | 1204±35 | 7347±107  | 4698±101  | 28.8±0.4  | 479.1±30.9  | 107.9±1.4  |
| N34 | 3173  | 11.4±0.9 | 205.3±2.5   | 33.1±0.9  | 10404±103  | 472±6   | 5951±13   | 2351±44   | 14.8±1    | 209.5±6     | 94.4±4.8   |
| N35 | 12738 | 62.9±4.5 | 223.9±10.1  | 115.7±1.3 | 33391±225  | 2725±20 | 17577±287 | 10460±124 | 35.9±2.9  | 575.5±36.8  | 104.2±7.9  |
| N36 | 10115 | 28.8±0.2 | 1599.3±16.7 | 48±2      | 17773±169  | 1151±7  | 10296±89  | 3546±43   | 20.2±0    | 167.5±13.6  | 68.6±0.4   |
| N37 | 1876  | 15.8±0.9 | 33.7±2      | 16.8±0.1  | 7936±339   | 565±3   | 3831±104  | 2060±11   | 16.7±0.7  | 114.3±5     | 22.4±0.5   |
| N38 | 10382 | 45.9±1.2 | 259.7±0.6   | 64.9±2.3  | 29753±1210 | 1625±15 | 13405±128 | 6370±126  | 15.9±0    | 555.1±54    | 70.5±0.1   |
| N39 | 4764  | 16.6±0.5 | 1163.2±7.7  | 46.9±0.4  | 12313±672  | 1139±21 | 7514±124  | 4505±138  | 19.3±0.7  | 445.4±9.2   | 70.2±0.7   |
| N40 | 9124  | 50.1±2.5 | 135.7±5.8   | 94.9±6.9  | 25668±732  | 2093±23 | 13601±358 | 8213±33   | 26.5±1.5  | 510.6±35.2  | 82.3±2     |
| N41 | 17880 | 82.3±0.7 | 161.6±2.3   | 133.3±3   | 40025±404  | 2542±28 | 25082±193 | 12486±114 | 22.2±0.3  | 960.1±14.1  | 123.5±6.1  |
| N42 | 11380 | 69.2±1.6 | 1778.6±58.8 | 142.5±2.3 | 33481±205  | 2630±20 | 18044±22  | 9875±128  | 27.1±0.1  | 763.5±16.1  | 136.8±1.2  |
| N43 | 2250  | 9.8±0.6  | 53.1±0.7    | 20±0.2    | 7349±132   | 615±7   | 1251±46   | 1799±12   | 3.1±0.1   | 117±6.6     | 49.4±1.8   |

|     |       |           |            |            |            |          |            |           |           |              |            |
|-----|-------|-----------|------------|------------|------------|----------|------------|-----------|-----------|--------------|------------|
| N44 | 15584 | 60.9±1.4  | 173.9±6.3  | 129.7±8.5  | 40355±1566 | 1970±24  | 23638±403  | 10871±107 | 182±8.9   | 897±18.6     | 115.4±7    |
| N45 | 8654  | 26.2±1.7  | 190.7±1.1  | 45.7±1.2   | 22379±745  | 1292±2   | 12058±224  | 4502±72   | 9.2±0.7   | 374.5±30.1   | 31.3±1     |
| N46 | 5518  | 23.9±1.1  | 258±3.2    | 44.8±2.5   | 19670±319  | 1121±8   | 11448±53   | 5183±17   | 42.9±2.8  | 366.4±19.7   | 87.2±3.7   |
| N47 | 8157  | 29.5±2.3  | 66.6±0.6   | 31.8±0.3   | 18950±552  | 1082±15  | 11780±314  | 3309±27   | 34.6±1.7  | 198.7±16.4   | 61.9±4.1   |
| N48 | 4016  | 20.9±0.1  | 68.7±0.8   | 33±0.9     | 11762±6    | 784±9    | 5735±31    | 3134±60   | 19.2±0.1  | 255.1±7.7    | 48.1±0.9   |
| N49 | 10999 | 100.9±4.5 | 181.5±2.1  | 230.6±2.4  | 31124±1974 | 5139±45  | 16816±7    | 16658±280 | 27.4±2.3  | 1741.1±0.4   | 73.6±1.7   |
| N50 | 12235 | 47.2±4.6  | 110.4±2.2  | 54.1±0.6   | 29822±713  | 1555±14  | 4879±63    | 6386±64   | 13±0.7    | 327.7±20.6   | 63.8±3.3   |
| N51 | 8819  | 40.9±3.6  | 79±7.4     | 62.8±0.4   | 32877±3138 | 1694±13  | 16250±522  | 8173±57   | 66.5±2.3  | 719.9±35     | 99.2±9.3   |
| N52 | 1437  | 7.9±0.2   | 274±0.1    | 20±0.3     | 4954±318   | 408±4    | 1129±7     | 1245±14   | 30.4±1.9  | 197.8±3.6    | 54.7±2.4   |
| N53 | 8993  | 108.6±4.7 | 217.6±14.4 | 345.5±7.2  | 25731±619  | 8503±11  | 16209±243  | 20523±309 | 37.8±0.3  | 3301.1±92.5  | 78.1±1.1   |
| N54 | 9371  | 33.6±2.1  | 188.5±1.7  | 59.9±0.6   | 25237±66   | 1242±4   | 13097±36   | 5705±4    | 48.1±2.8  | 478.1±7.9    | 82.3±7.7   |
| N55 | 21165 | 136.5±4   | 209±6.9    | 189.9±6.8  | 55729±194  | 4747±137 | 27632±375  | 19787±228 | 22.1±0.2  | 1143±93.2    | 193.3±9    |
| N56 | 8098  | 40.5±3.1  | 124.8±6.8  | 56.6±0.3   | 22950±256  | 1386±34  | 11131±287  | 5192±1    | 36.8±2.3  | 315.1±12.4   | 55.2±0.8   |
| N57 | 10993 | 61.4±3    | 277.6±5.4  | 116.6±0.2  | 34320±1565 | 2364±58  | 18367±62   | 9816±59   | 22.2±1.4  | 721.5±14.4   | 82.7±3.7   |
| N58 | 24190 | 126.3±0   | 319.2±22.8 | 243.3±0.5  | 55600±809  | 6001±3   | 33083±988  | 22618±356 | 51.8±1.9  | 1508.9±141.4 | 111.4±1.1  |
| N59 | 3077  | 15.1±0.4  | 38.9±1.2   | 28.9±0.7   | 10456±163  | 658±12   | 5623±60    | 2419±8    | 22.7±0.1  | 189.5±8.6    | 44.2±0     |
| N60 | 7489  | 31.7±2.8  | 124.5±6.8  | 37.8±1.8   | 22065±41   | 1317±23  | 9741±45    | 5693±26   | 43.4±2.8  | 455.9±8.5    | 59.2±5.1   |
| N61 | 14132 | 38.7±1.7  | 228.8±1.9  | 50.4±1.1   | 41094±555  | 2008±25  | 22292±3    | 7770±133  | 20.4±0.4  | 435.9±33     | 117.7±10.4 |
| N62 | 12479 | 65.7±2.4  | 118.5±1.2  | 97.1±1.7   | 36429±1011 | 1914±19  | 20407±462  | 9749±309  | 251.8±9.8 | 1066.1±23.2  | 147.5±4.5  |
| N63 | 24494 | 22.7±1.7  | 408.8±19.7 | 99.4±0.3   | 58314±528  | 3917±25  | 32131±87   | 15324±44  | 19.6±0.1  | 1178.5±91    | 137.6±11.8 |
| N64 | 17942 | 126.1±7.3 | 436.5±2.3  | 378.3±34.7 | 43031±494  | 7950±197 | 27191±719  | 23362±518 | 15±0.4    | 2010.8±117.4 | 189.2±15.2 |
| N65 | 26519 | 120±6.2   | 255.8±2.7  | 345.9±20.1 | 64680±924  | 5818±20  | 36244±1253 | 22138±484 | 12.2±1    | 1528.9±85.1  | 105.4±9.6  |
| N66 | 32960 | 126.5±8.3 | 224.9±0.5  | 253.8±8    | 82117±3437 | 6838±74  | 40513±7    | 29754±502 | 82.5±7.4  | 1265.7±39    | 147.9±7.3  |
| N67 | 4803  | 17.7±1.1  | 109.9±0.8  | 24.8±0.3   | 14977±70   | 795±13   | 7810±316   | 3172±13   | 53.4±1.7  | 283.9±24.6   | 59.6±5.9   |
| N68 | 18257 | 69.8±0.8  | 152.3±1.3  | 79.7±0.1   | 35991±98   | 2173±6   | 22420±598  | 10094±150 | 187.3±8.8 | 1119.7±79.6  | 178.9±4.7  |
| N69 | 7899  | 49.4±0.5  | 60.5±5.8   | 65±0       | 23074±608  | 2108±58  | 12238±69   | 7457±25   | 25.6±1    | 469.6±30.1   | 45.5±1.5   |
| N70 | 11396 | 20.9±1.2  | 89.8±5.3   | 22.6±0.4   | 22542±1140 | 1058±35  | 11636±40   | 4111±42   | 46.5±4.3  | 342.4±33.9   | 67.9±6.6   |
| N71 | 16834 | 69.5±1.3  | 132.3±1    | 120.6±5.1  | 42806±1288 | 2437±12  | 23520±6    | 10377±353 | 94.3±4.3  | 705.4±41.2   | 100.3±1    |
| N72 | 19551 | 94.9±2.1  | 137.5±1.1  | 65±0.2     | 61626±540  | 3464±8   | 33805±189  | 12930±68  | 21.2±1.7  | 684.3±42.2   | 39±1.7     |
| N73 | 8948  | 52.3±3.4  | 96.6±2.7   | 92.1±1.8   | 27638±733  | 1927±23  | 16817±182  | 7556±141  | 25.9±1.6  | 402.4±0.4    | 66.6±0.4   |
| N74 | 10254 | 52.1±1    | 126.7±12.6 | 109.6±0.3  | 29179±616  | 1620±29  | 16494±442  | 7836±40   | 15.9±1.3  | 480.6±3.2    | 50.8±1.5   |
| N75 | 9281  | 34.1±1.7  | 98.3±0.4   | 55.4±0.2   | 20462±59   | 1632±31  | 12243±3    | 6442±100  | 27.2±1.2  | 459.4±36.1   | 136.7±10.2 |
| N76 | 7603  | 82.9±2.1  | 211.1±2.4  | 115±8.5    | 31704±962  | 3107±38  | 15765±637  | 10881±40  | 35.1±0.1  | 1011±32.6    | 47.7±2     |

|      |       |           |            |           |            |          |           |           |           |             |            |
|------|-------|-----------|------------|-----------|------------|----------|-----------|-----------|-----------|-------------|------------|
| N77  | 10247 | 61.5±4.6  | 225.5±4.6  | 103.5±2.2 | 35077±749  | 2490±40  | 14748±389 | 12669±118 | 22.7±1.1  | 1072.4±59.4 | 21.8±0.5   |
| N78  | 20315 | 97.9±7.8  | 164.6±3.8  | 94.7±2.8  | 54288±1768 | 3478±30  | 32322±294 | 14571±331 | 54.5±1.2  | 704.6±55.6  | 70.5±4.6   |
| N79  | 3792  | 7.5±0     | 12.8±0.9   | 28.3±0    | 15316±119  | 804±1    | ND        | 2970±56   | 14.7±1.4  | 214.9±6.7   | 24.4±1.8   |
| N80  | 5961  | 34.1±0.6  | 77.3±2.1   | 41.6±0.8  | 17811±1668 | 1181±11  | 9259±105  | 4539±45   | 36±0.5    | 291.2±18.2  | 63.2±3.8   |
| N81  | 6063  | 25.9±2.3  | 195.8±3.2  | 42.1±0.1  | 13839±975  | 1188±12  | 7249±48   | 4578±12   | 52.2±3    | 574.5±17.5  | 68±4       |
| N82  | 2120  | 14.2±0.3  | 40.9±1.9   | 22.1±0.2  | 5539±336   | 520±19   | 2617±39   | 1839±17   | 11.6±0.4  | 178.4±0.8   | 21.9±1.1   |
| N83  | 18092 | 102.9±6.8 | 170.6±1.6  | 110.3±0.4 | 50061±1834 | 3374±15  | 27744±111 | 12613±30  | 25±0.7    | 661.8±30.8  | 123.6±2    |
| N84  | 9336  | 55.2±0.8  | 148.9±1    | 105.5±1.3 | 31238±701  | 2353±39  | 13938±171 | 9127±227  | 22.2±1.1  | 525.4±17.9  | 141±13.3   |
| N85  | 3841  | 20.9±0.1  | 150.4±3.2  | 35.9±1.1  | 10982±222  | 804±27   | 6136±35   | 2960±111  | 14.9±0.8  | 378.5±13.5  | 59.3±0.1   |
| N86  | 7965  | 47.2±0    | 50.2±2.5   | 75.3±2.2  | 23229±941  | 1521±15  | 10797±225 | 5264±35   | 39.3±3.3  | 488.2±43.2  | 70.1±1.8   |
| N87  | 15908 | 97±1.8    | 277.7±15.7 | 103.4±1.9 | 51933±966  | 3488±97  | 29570±81  | 12312±55  | 63±2.8    | 794.1±11.7  | 157.1±11.9 |
| N88  | 18184 | 42.1±3    | 437.3±3.9  | 78.1±5    | 39694±147  | 2283±16  | 19444±463 | 7830±103  | 21.7±0.1  | 579.2±42.7  | 68.4±4.3   |
| N89  | 10157 | 49.6±1.4  | 258.6±2.9  | 56.3±0.2  | 26788±210  | 1765±62  | 15959±346 | 6809±49   | 87.6±6.7  | 549.6±3     | 87.5±6.1   |
| N90  | 19859 | 210±11.2  | 119.3±2.3  | 259.8±0.7 | 62956±1291 | 6140±105 | 33558±215 | 19982±77  | 15.1±0.2  | 1384.5±5.1  | 180.5±7.6  |
| N91  | 17938 | 108.6±9.7 | 123.4±7    | 102.7±0.6 | 53352±1609 | 3520±5   | 27690±74  | 14762±7   | 33.4±1.6  | 628.7±45    | 83.5±3.6   |
| N92  | 17182 | 108.5±1.2 | 143.6±5    | 98.6±0.1  | 52424±5040 | 4217±31  | 28654±830 | 13072±39  | 20.7±1.1  | 511.8±10.6  | 85.8±6.7   |
| N93  | 3945  | 26.2±1.1  | 48.9±0.4   | 31.3±0.3  | 11886±471  | 1008±31  | 6436±10   | 3287±53   | 19.7±1.9  | 182±12.4    | 72.6±7.2   |
| N94  | 7035  | 34.8±1.3  | 310.5±2    | 71.7±4.2  | 17448±478  | 1285±10  | 8927±72   | 5430±88   | 84.3±1.6  | 646.4±17.6  | 61.1±2.4   |
| N95  | 5965  | 40.2±0.8  | 123.6±1.7  | 50.3±0.5  | 17757±635  | 1266±7   | 9862±137  | 3928±10   | 8.2±0.4   | 162.6±12.4  | 41.2±0.4   |
| N96  | 7854  | 40.1±1.7  | 839.9±15.2 | 45±0.5    | 26193±42   | 1516±2   | 14505±27  | 5943±21   | 73.2±1.4  | 414.6±30.9  | 97.1±2.8   |
| N97  | 9826  | 38.1±0.5  | 163.4±1.8  | 126.2±1.8 | 30280±813  | 2137±6   | 12041±144 | 11116±411 | 126±6.1   | 1167.5±20.7 | 111.7±0.5  |
| N98  | 9254  | 37.9±1    | 224.5±0.3  | 47.2±0.7  | 25781±974  | 1516±22  | 12106±313 | 5778±7    | 24.4±1.5  | 407.6±1.2   | 43.6±3.8   |
| N99  | 9238  | 25.8±0.9  | 74±5.3     | 43.4±0.2  | 23107±1008 | 1497±35  | 12206±201 | 3929±44   | 16.5±0.6  | 220.6±14.9  | 72±0.8     |
| N100 | 6161  | 35.5±3.1  | 63.7±1.4   | 51.6±0.9  | 18289±144  | 1128±25  | 11982±260 | 5150±85   | 30.4±1.9  | 266.8±17.8  | 37.5±2.9   |
| N101 | 7679  | 119.4±5.4 | 146.1±4.6  | 158.3±2.3 | 57232±2774 | 4055±43  | 36295±129 | 14457±431 | 42.9±1.7  | 673.8±64.3  | 109±2.4    |
| N102 | 11954 | 17.6±0.4  | 54.1±3.4   | 32.1±1.5  | 11547±410  | 711±9    | 6121±175  | 2548±21   | 17.1±1.1  | 175.1±16.2  | 52.4±0.9   |
| N103 | 5015  | 38.8±1.8  | 392±8.1    | 47.3±0    | 25728±65   | 1607±19  | 13444±102 | 5964±42   | 20±0.4    | 292.8±20.9  | 70.9±4.6   |
| N104 | 11777 | 5.7±0.1   | 237.3±3.8  | 26±0.3    | 3660±311   | 499±2    | 1603±29   | 1421±14   | 3±0.2     | 300.2±24.9  | 41.9±0.4   |
| N105 | 7437  | 38.6±1.1  | 99±1.1     | 60±0.9    | 14630±1    | 1015±10  | 7809±18   | 4858±19   | 101.3±0.9 | 461±23.8    | 67.4±2.8   |
| N106 | 4392  | 51.5±0    | 107.6±0.7  | 65.6±0.7  | 29755±856  | 1776±42  | 13420±127 | 6150±118  | 16.7±1.4  | 252.3±5.9   | 69.8±2.6   |
| N107 | 6639  | 1.4±0     | 159.6±2.8  | 11±0.1    | 4622±312   | 204±6    | 2401±106  | 779±29    | 1.7±0.1   | 130±4.8     | 46.7±1.7   |
| N108 | 19931 | 45.1±0.2  | 105.5±9.3  | 56.9±2.2  | 21484±736  | 1389±21  | 11497±250 | 5206±66   | 16.1±1.4  | 255.1±17.6  | 58.6±4.3   |
| N109 | 3203  | 10.8±0.8  | 13.4±1.2   | 48.6±0.3  | 13138±892  | 637±2    | 4815±23   | 522±2     | 3.6±0.3   | 1882.1±29.2 | 56±1       |

**Table S8.** The cutoff values of A<sub>m</sub>, m<sup>6</sup>A, m<sup>1</sup>A, m<sup>6</sup>A<sub>m</sub>, G<sub>m</sub>, m<sup>1</sup>G, C<sub>m</sub> and m<sup>5</sup>C.

|    | A <sub>m</sub>    | m <sup>6</sup> A | m <sup>6</sup> A <sub>m</sub> | m <sup>1</sup> A | G <sub>m</sub> | m <sup>1</sup> G | C <sub>m</sub> | m <sup>5</sup> C |
|----|-------------------|------------------|-------------------------------|------------------|----------------|------------------|----------------|------------------|
| Q1 | 2.77 <sup>a</sup> | 7.64             | 5.08                          | 2132             | 124            | 837              | 536            | 1.19             |
| Q3 | 5.10              | 23.6             | 9.62                          | 2973             | 214            | 1527             | 864            | 5.26             |

<sup>a</sup>nmol/mmol Cr

Q1: the first quartile, Q3: the third quartile

**Table S9.** Univariate and multivariate analysis of risk factors of early-stage breast cancer.

| Factors                                              | Univariate analysis |             |                | Multivariate analysis |             |                |
|------------------------------------------------------|---------------------|-------------|----------------|-----------------------|-------------|----------------|
|                                                      | OR                  | 95% CI      | <i>p</i> value | OR                    | 95% CI      | <i>p</i> value |
| Age (years)                                          |                     |             |                |                       |             |                |
| ≤ 50                                                 | 1                   |             |                | 1                     |             |                |
| > 50                                                 | 2.423               | 1.421-4.130 | <b>0.001</b>   | 2.812                 | 1.434-5.513 | <b>0.003</b>   |
| BMI (kg/m <sup>2</sup> )                             |                     |             |                |                       |             |                |
| ≤ 24                                                 | 1                   |             |                |                       |             |                |
| > 24                                                 | 1.791               | 1.013-3.165 | <b>0.045</b>   |                       |             |                |
| Menarche age (years)                                 |                     |             |                |                       |             |                |
| ≤ 12                                                 | 1                   |             |                |                       |             |                |
| > 12                                                 | 0.752               | 0.406-1.574 | <b>0.005</b>   |                       |             |                |
| CA153 (U/mL)                                         |                     |             |                |                       |             |                |
| ≤ 25                                                 | 1                   |             |                |                       |             |                |
| > 25                                                 | 0.849               | 0.118-6.131 | 0.871          |                       |             |                |
| A <sub>m</sub> (nmol/mmol Creatinine)                |                     |             |                |                       |             |                |
| < 2.77                                               | 1                   |             |                | 1                     |             |                |
| 2.77-5.10                                            | 0.258               | 0.122-0.544 | < <b>0.001</b> | 0.342                 | 0.130-0.901 | <b>0.030</b>   |
| > 5.10                                               | 0.093               | 0.039-0.220 | < <b>0.001</b> | 0.123                 | 0.038-0.401 | <b>0.001</b>   |
| m <sup>6</sup> A (nmol/mmol Creatinine)              |                     |             |                |                       |             |                |
| < 7.64                                               | 1                   |             |                | 1                     |             |                |
| 7.64-23.6                                            | 0.281               | 0.140-0.566 | < <b>0.001</b> | 0.348                 | 0.139-0.874 | <b>0.025</b>   |
| > 23.6                                               | 0.255               | 0.116-0.559 | <b>0.001</b>   | 0.257                 | 0.092-0.716 | <b>0.009</b>   |
| m <sup>1</sup> A (nmol/mmol Creatinine)              |                     |             |                |                       |             |                |
| < 2132                                               | 1                   |             |                |                       |             |                |
| 2132-2973                                            | 0.204               | 0.096-0.430 | < <b>0.001</b> |                       |             |                |
| > 2973                                               | 0.157               | 0.068-0.363 | < <b>0.001</b> |                       |             |                |
| m <sup>6</sup> A <sub>m</sub> (nmol/mmol Creatinine) |                     |             |                |                       |             |                |
| < 5.08                                               | 1                   |             |                |                       |             |                |
| 5.08-9.62                                            | 0.539               | 0.282-1.031 | 0.062          |                       |             |                |
| > 9.62                                               | 0.463               | 0.220-0.974 | <b>0.042</b>   |                       |             |                |

|                                         |       |             |                   |       |             |              |
|-----------------------------------------|-------|-------------|-------------------|-------|-------------|--------------|
| G <sub>m</sub> (nmol/mmol Creatinine)   |       |             |                   |       |             |              |
| < 124                                   | 1     |             |                   |       |             |              |
| 124-214                                 | 0.405 | 0.206-0.797 | <b>0.009</b>      |       |             |              |
| > 214                                   | 0.238 | 0.109-0.517 | <b>&lt; 0.001</b> |       |             |              |
| m <sup>1</sup> G (nmol/mmol Creatinine) |       |             |                   |       |             |              |
| < 837                                   | 1     |             |                   | 1     |             |              |
| 837-1527                                | 0.222 | 0.103-0.479 | <b>&lt; 0.001</b> | 0.337 | 0.127-0.899 | <b>0.030</b> |
| > 1527                                  | 0.083 | 0.034-0.200 | <b>&lt; 0.001</b> | 0.250 | 0.081-0.770 | <b>0.016</b> |
| C <sub>m</sub> (nmol/mmol Creatinine)   |       |             |                   |       |             |              |
| < 536                                   | 1     |             |                   |       |             |              |
| 536-864                                 | 0.459 | 0.237-0.887 | <b>0.021</b>      |       |             |              |
| > 864                                   | 0.315 | 0.148-0.671 | <b>0.003</b>      |       |             |              |
| m <sup>5</sup> C (nmol/mmol Creatinine) |       |             |                   |       |             |              |
| < 1.19                                  | 1     |             |                   |       |             |              |
| 1.19-5.26                               | 0.306 | 0.152-0.616 | <b>0.001</b>      |       |             |              |
| > 5.26                                  | 0.213 | 0.096-0.472 | <b>&lt; 0.001</b> |       |             |              |

---
